# Supplementary material for: Comparative genome-centric analysis reveals seasonal variation in the function of coral reef microbiomes
Source: PubMed Central journal article supplement (PMC7242418; doi:10.1038/s41396-020-0622-6), 2020-03-02
Supplement: 41396_2020_622_MOESM1_ESM.pdf [file 41396_2020_622_MOESM1_ESM.pdf]

## Comparative genome-centric analysis reveals seasonal variation in the function of coral reef microbiomes

Bettina Glasl<sup>a,b,c,\*</sup>, Steven Robbins<sup>d</sup>, Pedro R. Frade<sup>e</sup>, Emma Marangon<sup>a,b,c</sup>, Patrick Laffy<sup>a</sup>, David G. Bourne<sup>a,b,c</sup>, and Nicole S. Webster<sup>a,c,d</sup>

<sup>a</sup> Australian Institute of Marine Science, Townsville, Qld, Australia

<sup>b</sup> College of Science and Engineering, James Cook University, Townsville, Qld, Australia

<sup>c</sup> AIMS@JCU, Townsville, Qld, Australia

<sup>d</sup> Australian Centre for Ecogenomics, University of Queensland, Brisbane, Qld, Australia

<sup>e</sup> Centre of Marine Sciences, University of Algarve, Faro, Portugal

\* Corresponding author: Bettina Glasl ([b.glasl@aims.gov.au](mailto:b.glasl@aims.gov.au))

### Content:

- 14 Supplementary Figures
- 7 Supplementary Tables

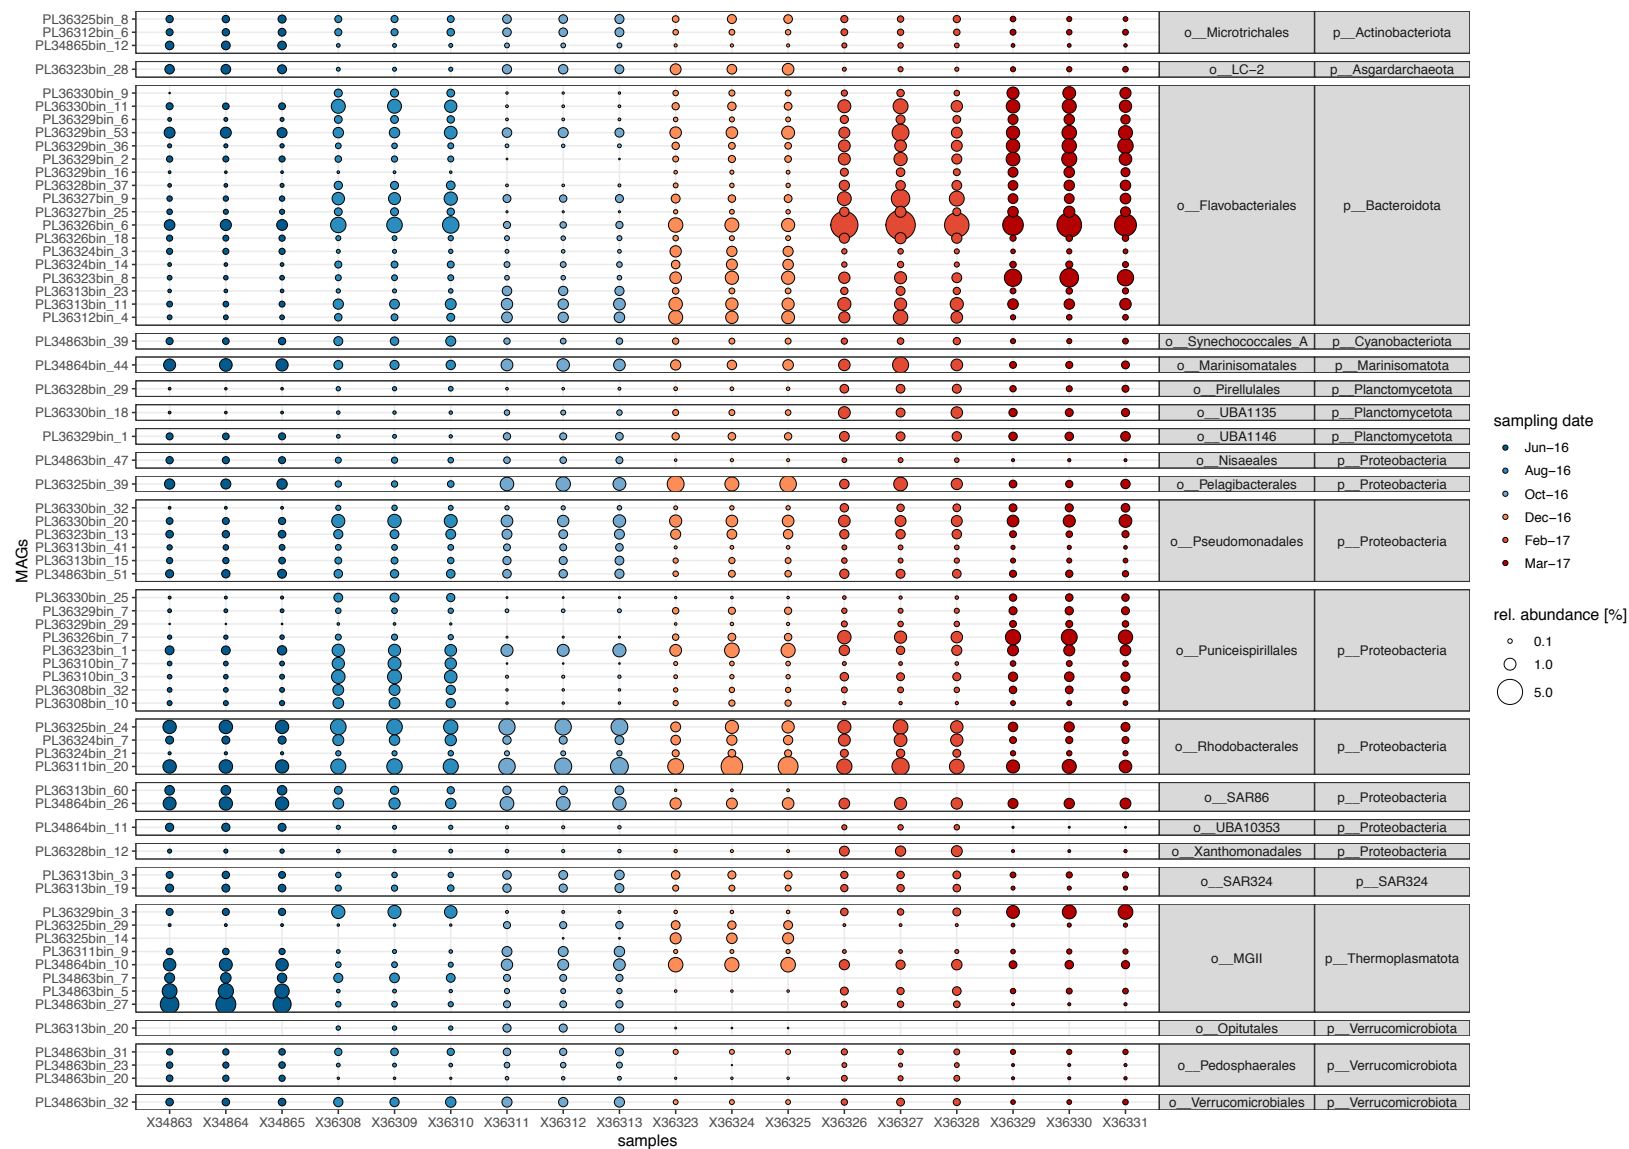

**Figure S1.** Relative abundance of seawater MAGs<sub>95%ANI</sub>.

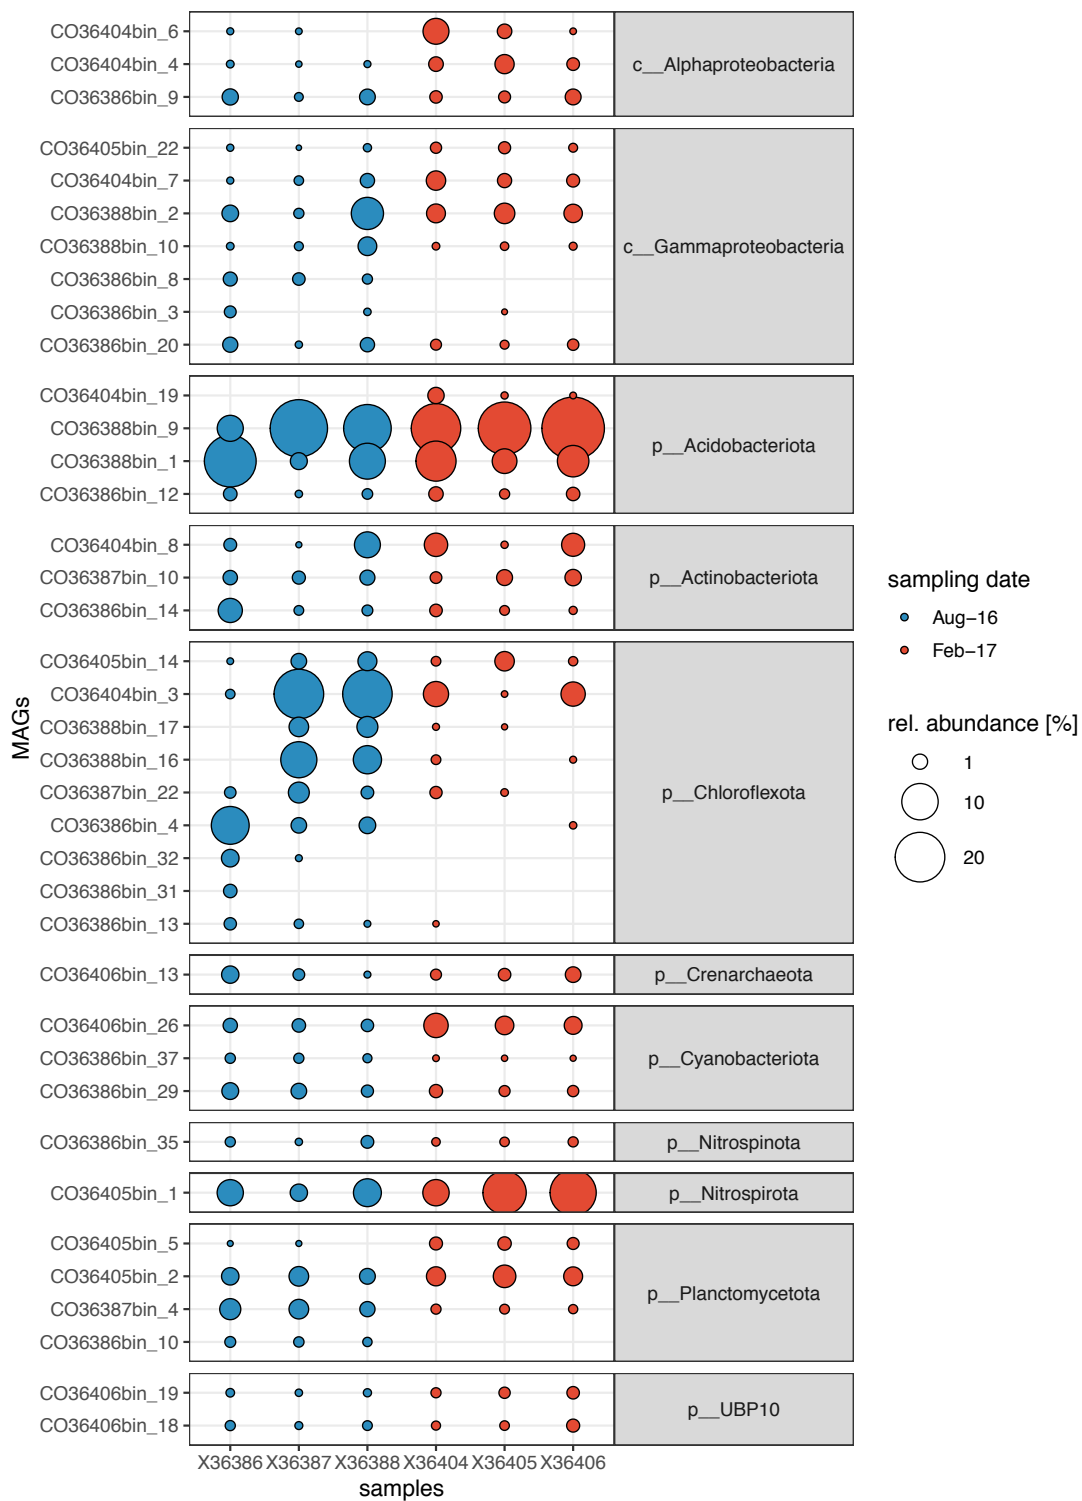

**Figure S2.** Relative abundance of sponge MAGs<sub>95%ANI</sub>.

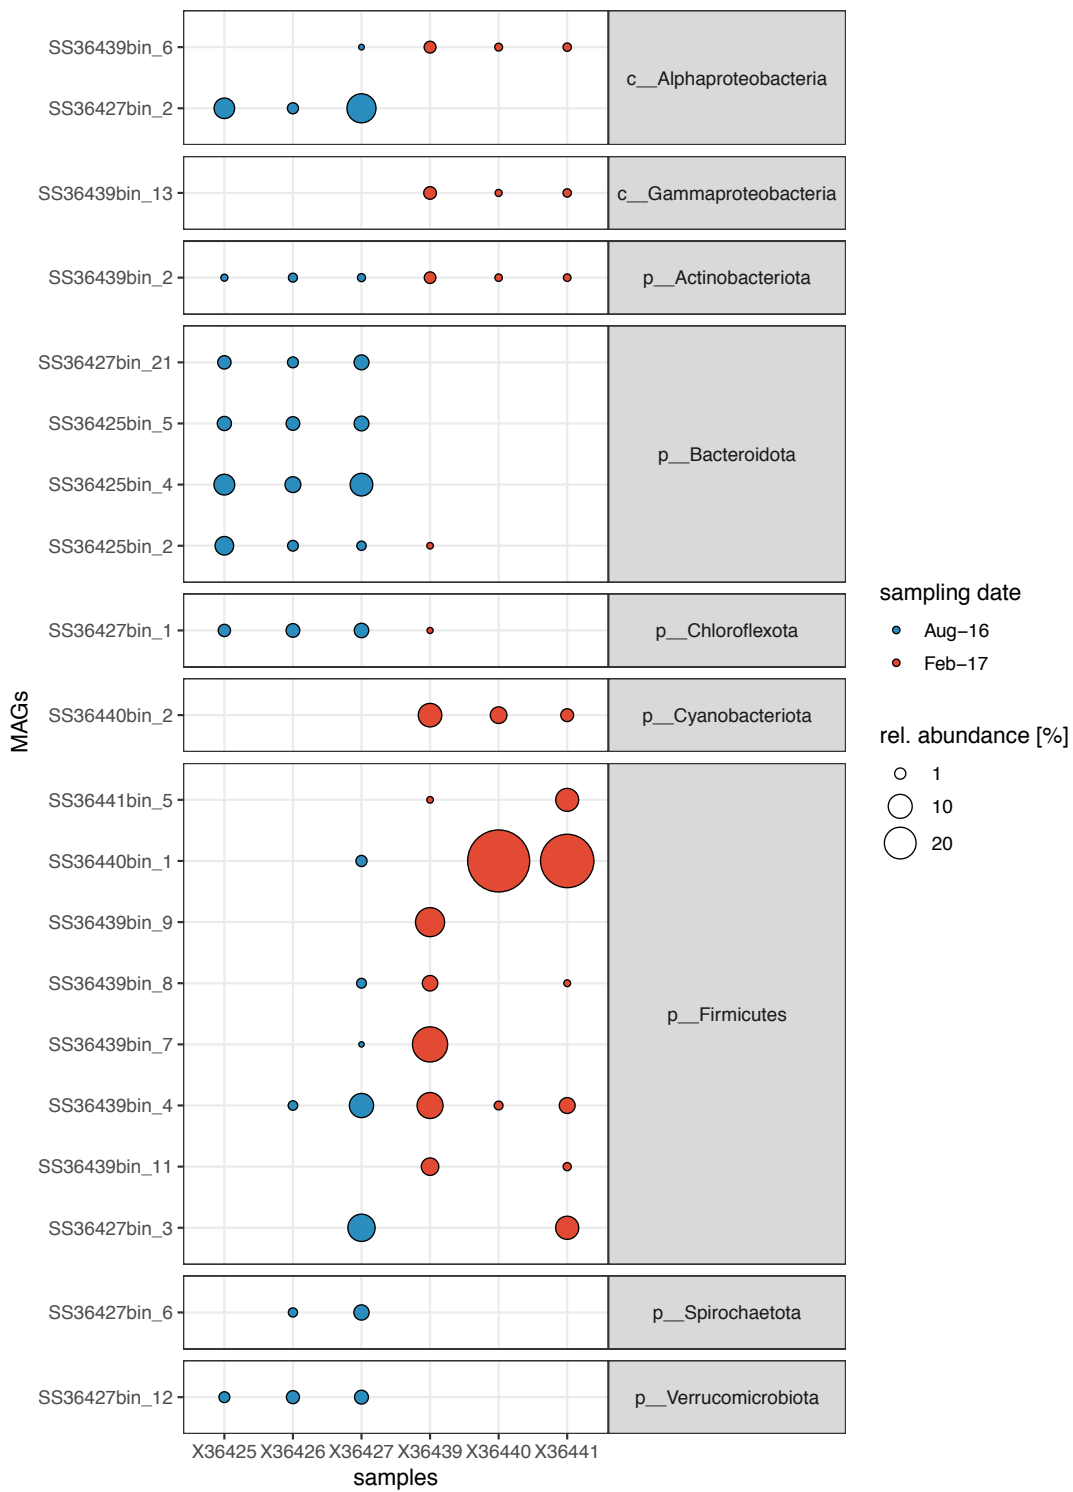

**Figure S3.** Relative abundance of macroalgae MAGs<sub>95%ANI</sub>.

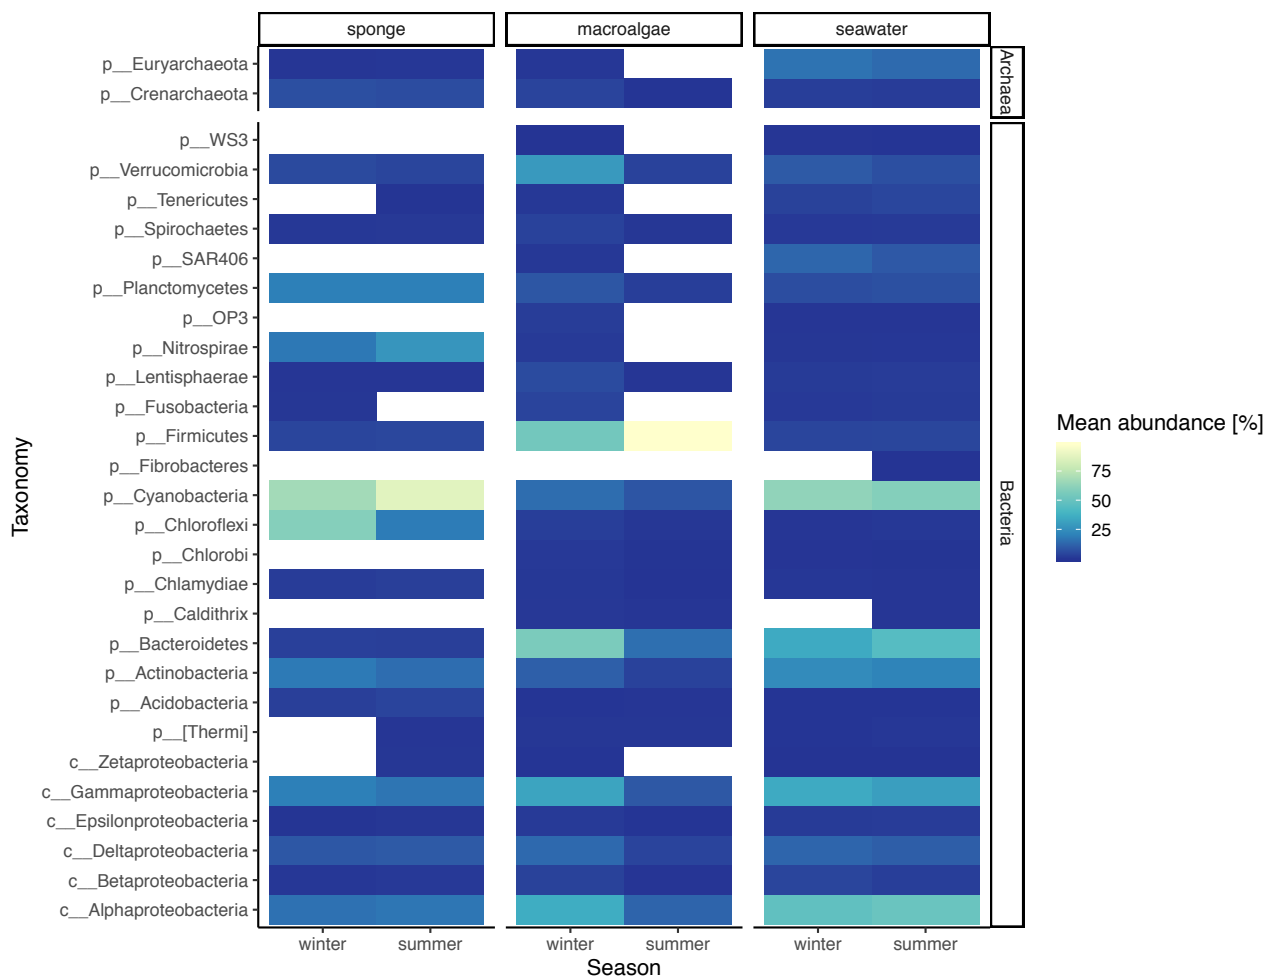

**Figure S4.** Average relative abundance of microbial taxa based on 16S rRNA genes present in the metagenomic reads in sponge, macroalgae, and seawater samples.

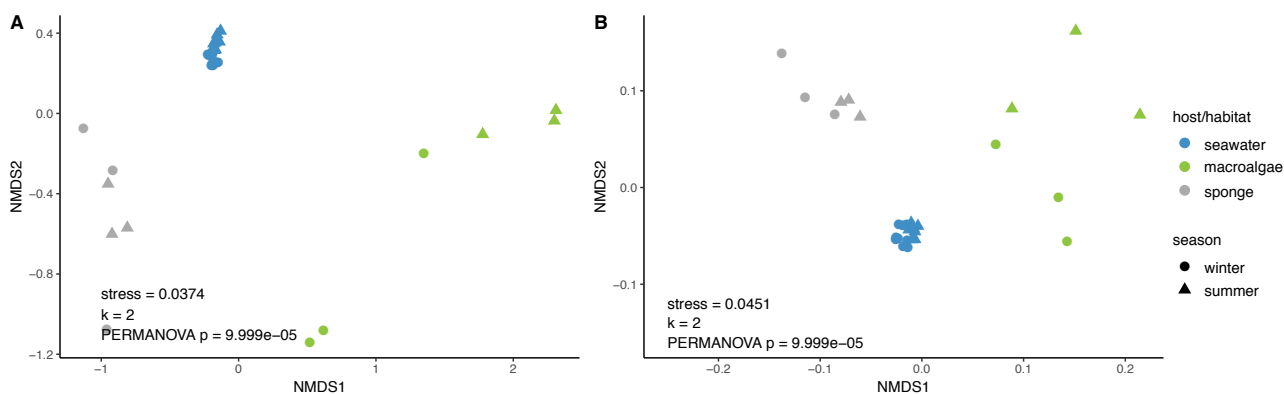

**Figure S5.** Gene-centric approach: taxonomic and functional annotation of metagenome reads. A) Community composition based on adapter trimmed reads was inferred using GraftM v0.12.0 (<https://github.com/geronimp/graftM>). B) Assembled reads (scaffolds) were used to assess the functional variability of seawater, sponge and macroalgae microbiomes. The functional annotation was performed with enrichM v0.4.7 (<https://github.com/geronimp/enrichM>) using the KEGG Orthology (KOs). The functional and taxonomic variability between seawater, sponge and macroalgae microbiomes was assessed with PERMANOVAs and Non-metric multidimensional scaling (NMDS) based on Bray-Curtis dissimilarities in R using the vegan package.

|                                                                                                                       |  | Biosynthesis of other secondary metabolites | Biosynthesis of other secondary metabolites |
|-----------------------------------------------------------------------------------------------------------------------|--|---------------------------------------------|---------------------------------------------|
| M00787_Bacilysin biosynthesis, prephenate => bacilysin                                                                |  |                                             |                                             |
| M00580_Pentose phosphate pathway, archaea, fructose 6P => ribose 5P                                                   |  |                                             |                                             |
| M00308_Semi-phosphorylative Entner-Doudoroff pathway, gluconate => glycerate-3P                                       |  |                                             |                                             |
| M00011_Citrate cycle, second carbon oxidation, 2-oxoglutarate => oxaloacetate                                         |  |                                             |                                             |
| M00010_Citrate cycle, first carbon oxidation, oxaloacetate => 2-oxoglutarate                                          |  |                                             |                                             |
| M00009_Citrate cycle (TCA cycle, Krebs cycle)                                                                         |  |                                             |                                             |
| M00008_Entner-Doudoroff pathway, glucose-6P => glyceraldehyde-5P + pyruvate                                           |  |                                             |                                             |
| M00007_Pentose phosphate pathway, non-oxidative phase, fructose 6P => ribose 5P                                       |  | Central carbohydrate metabolism             | Carbohydrate metabolism                     |
| M00006_Pentose phosphate pathway, oxidative phase, glucose 6P => ribulose 5P                                          |  |                                             |                                             |
| M00005_PFRP biosynthesis, ribose 5P => FRPP                                                                           |  |                                             |                                             |
| M00004_Pentose phosphate pathway (Pentose phosphate cycle)                                                            |  |                                             |                                             |
| M00003_Gluconeogenesis, oxaloacetate => fructose-6P                                                                   |  |                                             |                                             |
| M00002_Glycolysis, core module involving three-carbon compounds                                                       |  |                                             |                                             |
| M00001_Glycolysis (Embden-Meyerhof pathway), glucose => pyruvate                                                      |  |                                             |                                             |
| M00654_Glycogen biosynthesis, glucose-1P => glycogen/starch                                                           |  |                                             |                                             |
| M00741_Propanoyl-CoA metabolism, propanoyl-CoA => succinyl-CoA                                                        |  |                                             |                                             |
| M00632_Galactose degradation, Leloir pathway, galactose => alpha-D-glucose-1P                                         |  |                                             |                                             |
| M00631_D-Galacturonate degradation (bacteria), D-galacturonate => pyruvate + D-glyceraldehyde 3P                      |  |                                             |                                             |
| M00565_Trehalose biosynthesis, D-glucose 1P => trehalose                                                              |  |                                             |                                             |
| M00554_Nucleotide sugar biosynthesis, galactose => UDP-galactose                                                      |  | Other carbohydrate metabolism               | Carbohydrate metabolism                     |
| M00552_D-galactonate degradation, De Ley-Doudoroff pathway, D-galactonate => glycerate-3P                             |  |                                             |                                             |
| M00550_Ascorbate degradation, ascorbate => D-xylose-5P                                                                |  |                                             |                                             |
| M00549_Nucleotide sugar biosynthesis, glucose => UDP-glucose                                                          |  |                                             |                                             |
| M00373_Ethylmalonyl pathway                                                                                           |  |                                             |                                             |
| M00061_D-Glucuronate degradation, D-glucuronate => pyruvate + D-glyceraldehyde 3P                                     |  |                                             |                                             |
| M00013_Malonate semialdehyde pathway, propanoyl-CoA => acetyl-CoA                                                     |  |                                             |                                             |
| M00012_Glyoxylate cycle                                                                                               |  |                                             |                                             |
| M00417_Cytochrome o ubiquinol oxidase                                                                                 |  |                                             |                                             |
| M00416_Cytochrome aa3-600 menaquinol oxidase                                                                          |  |                                             |                                             |
| M00159_V/A-type ATPase, prokaryotes                                                                                   |  |                                             |                                             |
| M00157_F-type ATPase, prokaryotes and chloroplasts                                                                    |  |                                             |                                             |
| M00156_Cytochrome c oxidase, cbb3-type                                                                                |  | ATP synthesis                               | Energy metabolism                           |
| M00155_Cytochrome c oxidase, prokaryotes                                                                              |  |                                             |                                             |
| M00151_Cytochrome bc1 complex respiratory unit                                                                        |  |                                             |                                             |
| M00150_Fumarate reductase, prokaryotes                                                                                |  |                                             |                                             |
| M00149_Succinate dehydrogenase, prokaryotes                                                                           |  |                                             |                                             |
| M00145_NAD(P)H:quinone oxidoreductase, chloroplasts and cyanobacteria                                                 |  |                                             |                                             |
| M00144_NAD:quinone oxidoreductase, prokaryotes                                                                        |  |                                             |                                             |
| M00579_Phosphate acetyltransferase-acetate kinase pathway, acetyl-CoA => acetate                                      |  |                                             |                                             |
| M00173_Reductive citrate cycle (Arnon-Buchanan cycle)                                                                 |  |                                             |                                             |
| M00172_C4-dicarboxylic acid cycle, NADP - malic enzyme type                                                           |  |                                             |                                             |
| M00169_CAM (Crassulacean acid metabolism), light                                                                      |  | Carbon fixation                             | Energy metabolism                           |
| M00168_CAM (Crassulacean acid metabolism), dark                                                                       |  |                                             |                                             |
| M00167_Reductive pentose phosphate cycle, glyceraldehyde-3P => ribulose-5P                                            |  |                                             |                                             |
| M00166_Reductive pentose phosphate cycle, ribulose-5P => glyceraldehyde-3P                                            |  |                                             |                                             |
| M00165_Reductive pentose phosphate cycle (Calvin cycle)                                                               |  |                                             |                                             |
| M00378_F420 biosynthesis                                                                                              |  |                                             |                                             |
| M00346_Formaldehyde assimilation, serine pathway                                                                      |  |                                             |                                             |
| M00345_Formaldehyde assimilation, ribulose monophosphate pathway                                                      |  | Methane metabolism                          | Energy metabolism                           |
| M00174_Methane oxidation, methanotroph, methane => formaldehyde                                                       |  |                                             |                                             |
| M00531_Assimilatory nitrate reduction, nitrate => ammonia                                                             |  |                                             |                                             |
| M00530_Dissimilatory nitrate reduction, nitrate => ammonia                                                            |  | Nitrogen metabolism                         | Energy metabolism                           |
| M00597_Anoxygenic photosystem II                                                                                      |  |                                             |                                             |
| M00163_Photosystem I                                                                                                  |  |                                             |                                             |
| M00161_Photosystem II                                                                                                 |  | Photosynthesis                              | Energy metabolism                           |
| M00596_Dissimilatory sulfate reduction, sulfate => H2S                                                                |  |                                             |                                             |
| M00595_Thiosulfate oxidation by SOX complex, thiosulfate => sulfate                                                   |  |                                             |                                             |
| M00176_Assimilatory sulfate reduction, sulfate => H2S                                                                 |  | Sulfur metabolism                           | Energy metabolism                           |
| M00817_Lantibiotic transport system                                                                                   |  |                                             |                                             |
| M00815_Lantibiotic transport system                                                                                   |  |                                             |                                             |
| M00762_Copper-processing system                                                                                       |  |                                             |                                             |
| M00747_Bacitracin transport system                                                                                    |  |                                             |                                             |
| M00634_Oleandomycin transport system                                                                                  |  |                                             |                                             |
| M00584_Acetoacetyl utilization transport system                                                                       |  |                                             |                                             |
| M00320_Lipopolymer export system                                                                                      |  |                                             |                                             |
| M00315_Uncharacterized ABC transport system                                                                           |  |                                             |                                             |
| M00314_Bacitracin transport system                                                                                    |  |                                             |                                             |
| M00259_Heme transport system                                                                                          |  |                                             |                                             |
| M00258_Putative ABC transport system                                                                                  |  |                                             |                                             |
| M00256_Cell division transport system                                                                                 |  |                                             |                                             |
| M00255_Lipoprotein-releasing system                                                                                   |  |                                             |                                             |
| M00254_ABC-2 type transport system                                                                                    |  |                                             |                                             |
| M00253_Sodium transport system                                                                                        |  |                                             |                                             |
| M00252_Lipooligosaccharide transport system                                                                           |  |                                             |                                             |
| M00251_Teichoic acid transport system                                                                                 |  |                                             |                                             |
| M00250_Lipopolysaccharide transport system                                                                            |  |                                             |                                             |
| M00249_Capsular polysaccharide transport system                                                                       |  |                                             |                                             |
| M00224_Fluoroquinolone transport system                                                                               |  |                                             |                                             |
| M00360_Aminoacyl-tRNA biosynthesis, prokaryotes                                                                       |  | Aminoacyl-tRNA Metabolism                   | Environmental information processing        |
| M00359_Aminoacyl-tRNA biosynthesis, eukaryotes                                                                        |  |                                             |                                             |
| M00429_Competence-related DNA transformation transporter                                                              |  |                                             |                                             |
| M00336_Twin-arginine translocation (Tat) system                                                                       |  |                                             |                                             |
| M00335_Sec (secretion) system                                                                                         |  | Bacterial secretion system                  | Environmental information processing        |
| M00333_Type IV secretion system                                                                                       |  |                                             |                                             |
| M00331_Type II general secretion pathway                                                                              |  |                                             |                                             |
| M00330_Adhesin protein transport system                                                                               |  |                                             |                                             |
| M00765_Multidrug resistance, efflux pump Bmr                                                                          |  |                                             |                                             |
| M00738_Bacitracin resistance, BcaAB transporter                                                                       |  |                                             |                                             |
| M00720_Multidrug resistance, efflux pump VexEF-ToIC                                                                   |  |                                             |                                             |
| M00717_Multidrug resistance, efflux pump NorA                                                                         |  |                                             |                                             |
| M00715_Lincosamide resistance, efflux pump LmrB                                                                       |  | Drug efflux transporter/pump                | Environmental information processing        |
| M00712_Multidrug resistance, efflux pump YkkCD                                                                        |  |                                             |                                             |
| M00710_Multidrug resistance, efflux pump EbrAB                                                                        |  |                                             |                                             |
| M00707_Multidrug resistance, MdrAB/SmdAB transporter                                                                  |  |                                             |                                             |
| M00647_Multidrug resistance, efflux pump AcrAB-ToIC/mef                                                               |  |                                             |                                             |
| M00754_Nisin resistance, phage shock protein homolog LshA                                                             |  |                                             |                                             |
| M00743_Aminoglycoside resistance, protease HtpX                                                                       |  |                                             |                                             |
| M00742_Aminoglycoside resistance, protease FtsH                                                                       |  |                                             |                                             |
| M00728_Cationic antimicrobial peptide (CAMP) resistance, envelope protein folding and degrading factors DegP and DsbA |  | Drug resistance                             | Environmental information processing        |
| M00727_Cationic antimicrobial peptide (CAMP) resistance, N-acetylmuramoyl-L-alanine amidase AmiA and AmiC             |  |                                             |                                             |
| M00628_beta-Lactam resistance, AmpC system                                                                            |  |                                             |                                             |

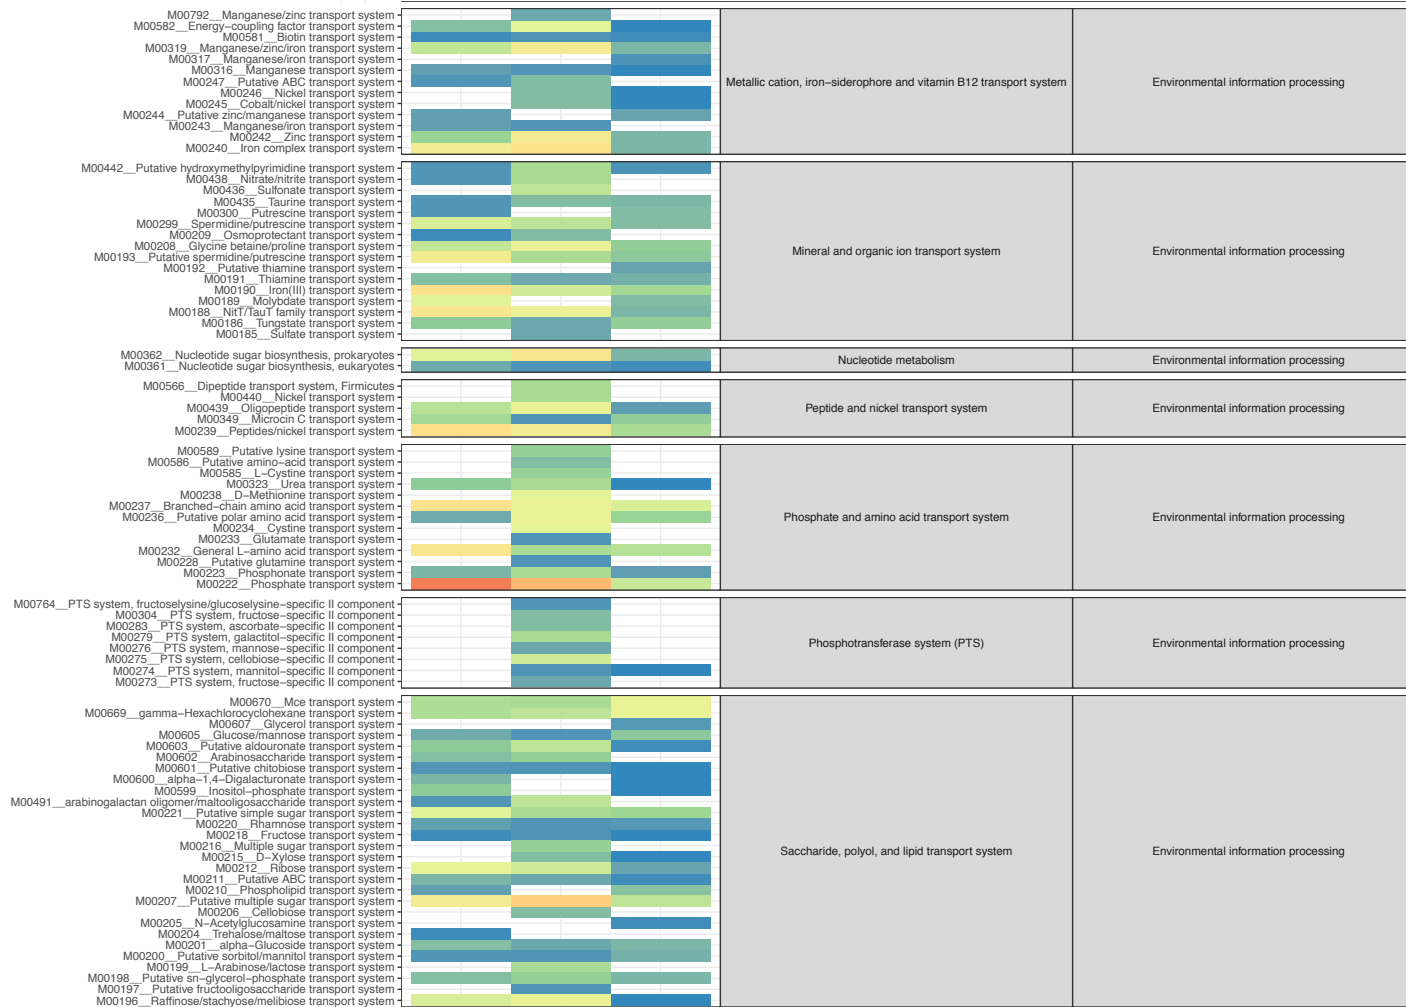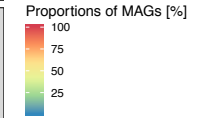

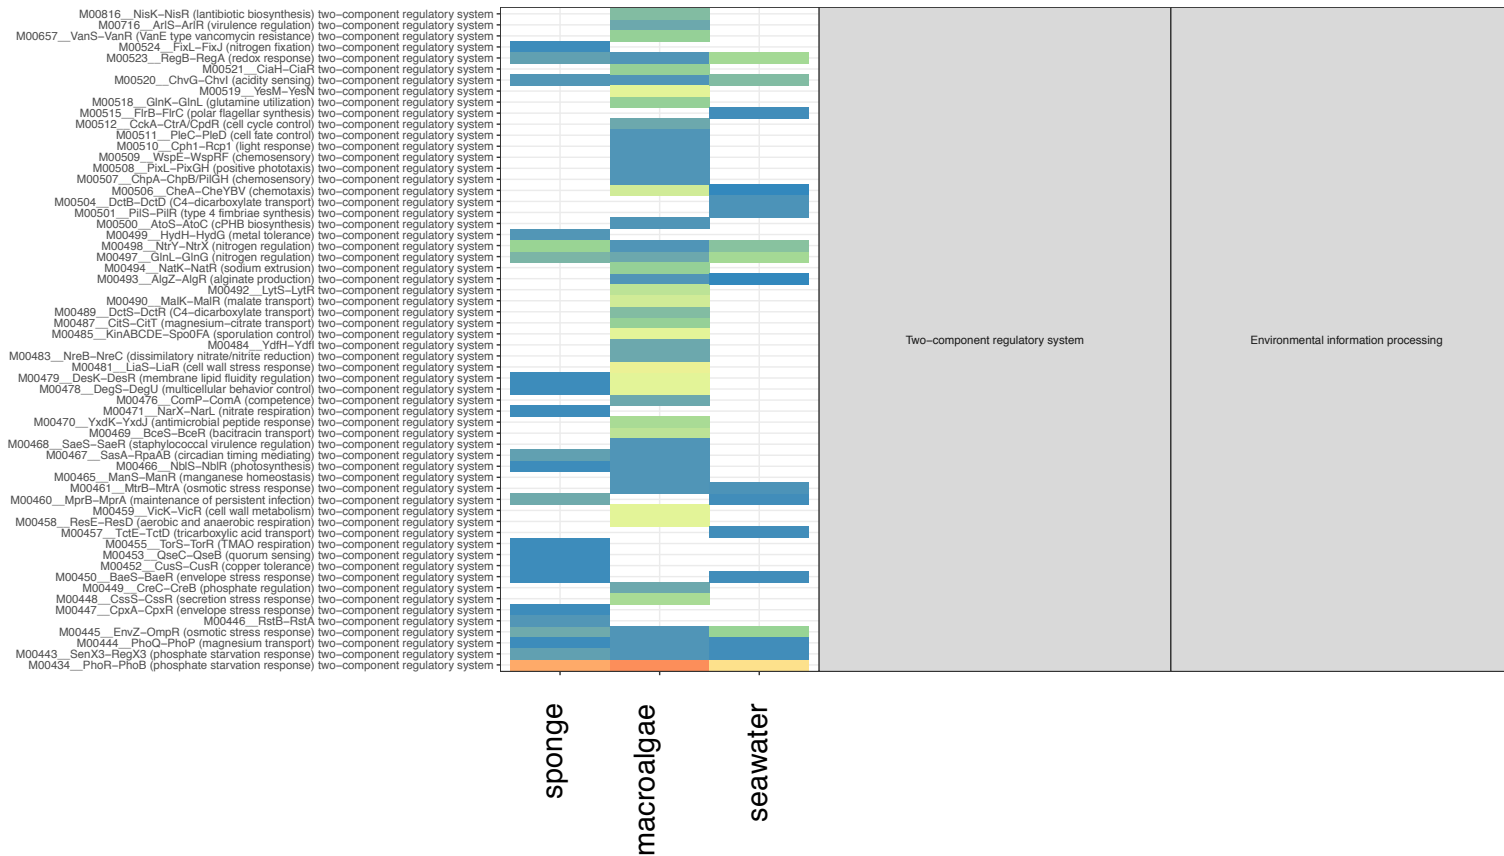

**Figure S6.** Unique and shared KEGG Modules involved in carbohydrate metabolism, energy metabolism, processing of environmental information and production of other secondary metabolites of sponge, algae and seawater microbiomes. Colour represents the relative proportions of MAGs [in %] in a habitat (sponge, macroalgae and seawater) possessing a certain function.



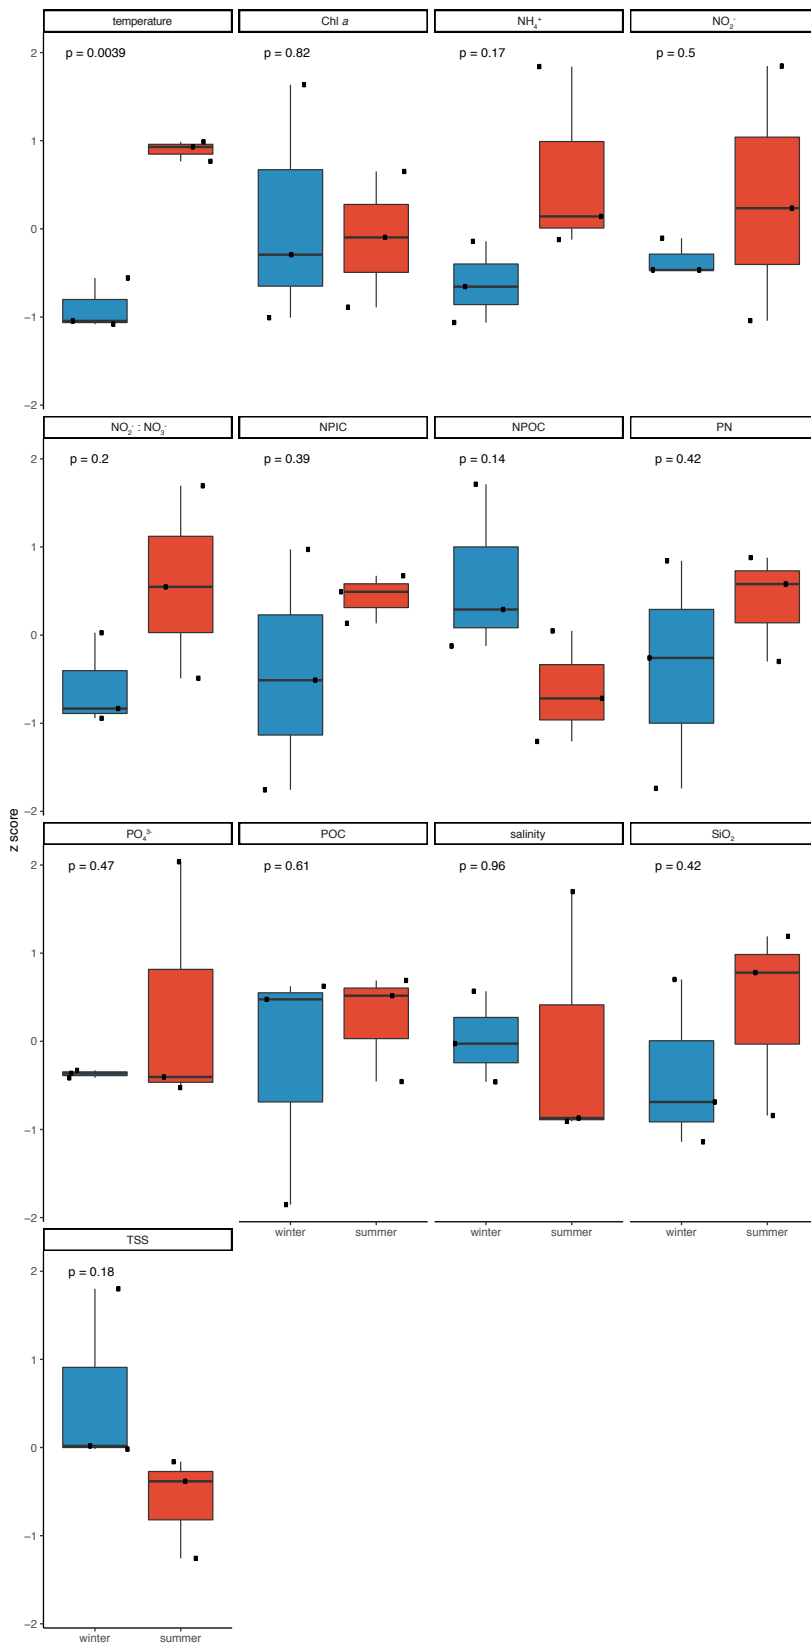

**Figure S7.** Seasonal variation of environmental parameters. All data were z-score standardised and variation between winter (Jun-16, Aug-16, Oct-16) and summer (Dec-16, Feb-16, Mar-16) was analysed using a t-test.

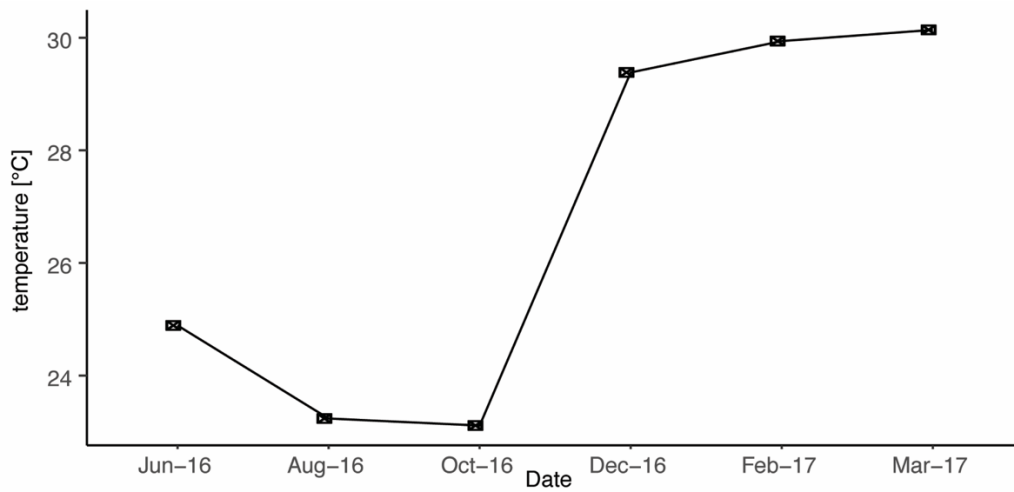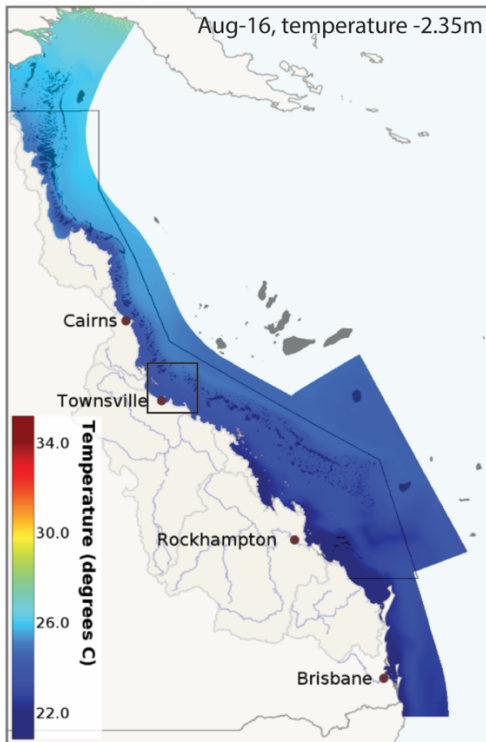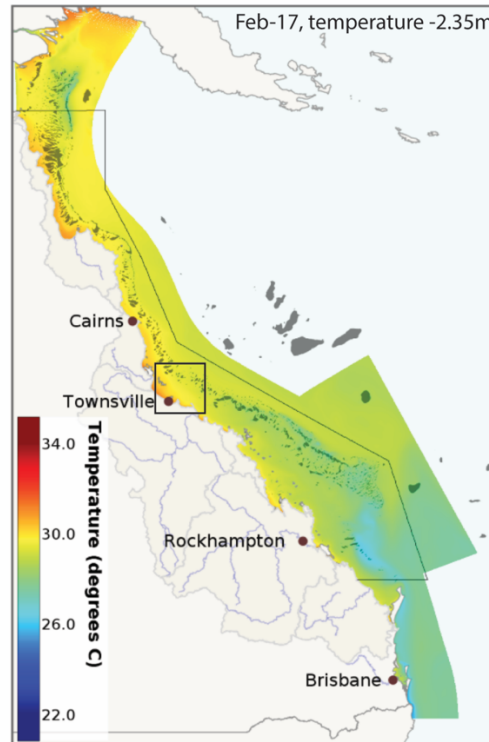

**Figure S8.** Seawater temperature variation between winter (June, August, October) and summer (December, February, March) at the sampling location (Geoffrey Bay, Magnetic Island, Australia). Monthly average seawater temperature in August 2016 and February 2017 along the Great Barrier Reef. Seawater temperature data were retrieved from the eReefs database (<https://aims.eereefs.org.au/>).

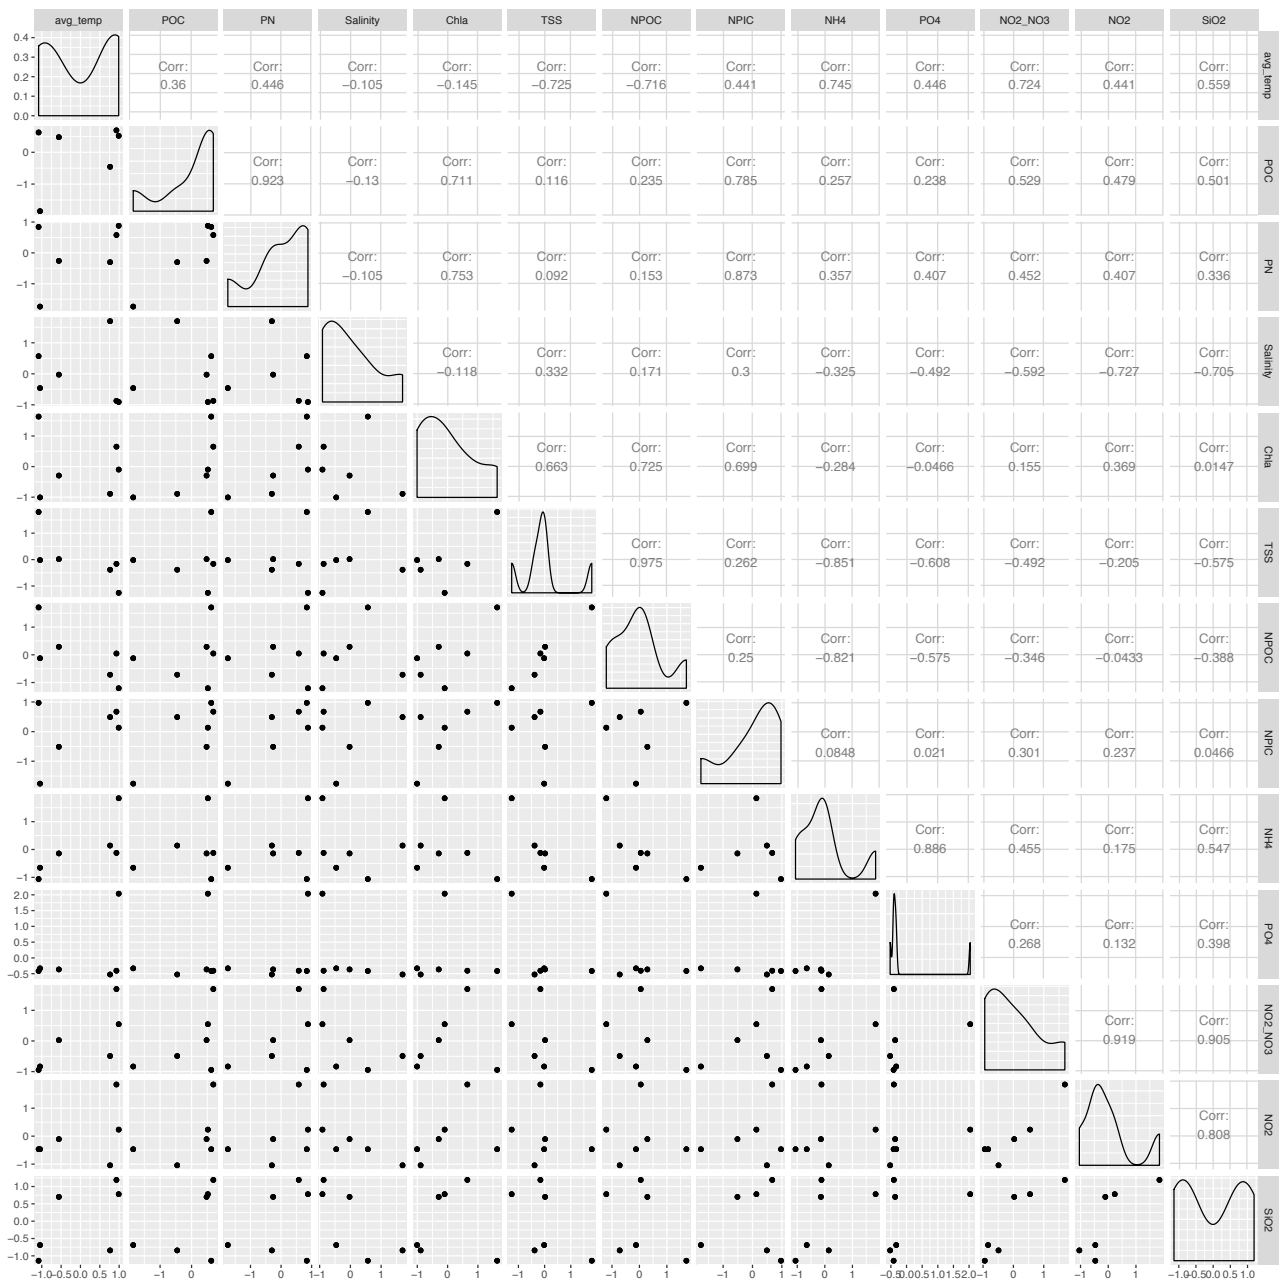

**Figure S9.** Co-linearity of environmental metadata collected at Geoffrey Bay (Magnetic Island) in (Jun-16, Aug-16, Oct-16, Dec-16, Feb-16, Mar-16 calculated with Pearson correlation (co-linearity threshold: > 0.7 or < -0.7).

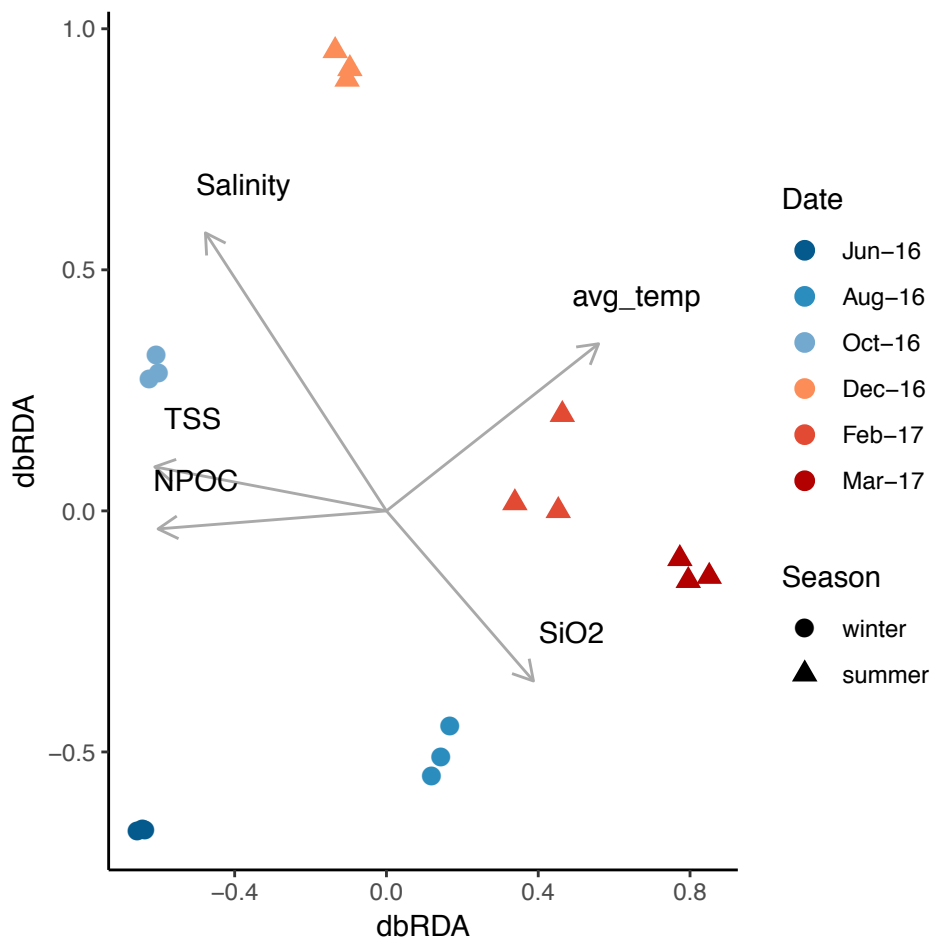

**Figure S10.** Distance-based redundancy analysis (dbRDA) displaying the influence of significant environmental drivers on the MAGs<sub>95%ANI</sub> community profiles for seawater samples (including additional sampling time points of the seawater samples). Temperature (avg\_temp), salinity, total suspended solid concentration (TSS), non-purgeable organic carbon (NPOC) concentration, and silica (SiO<sub>2</sub>) concentration in the seawater significantly explained 96.6% of the observed MAGs<sub>95%ANI</sub> community variation. Co-linear environmental parameters are displayed in Figure S9.

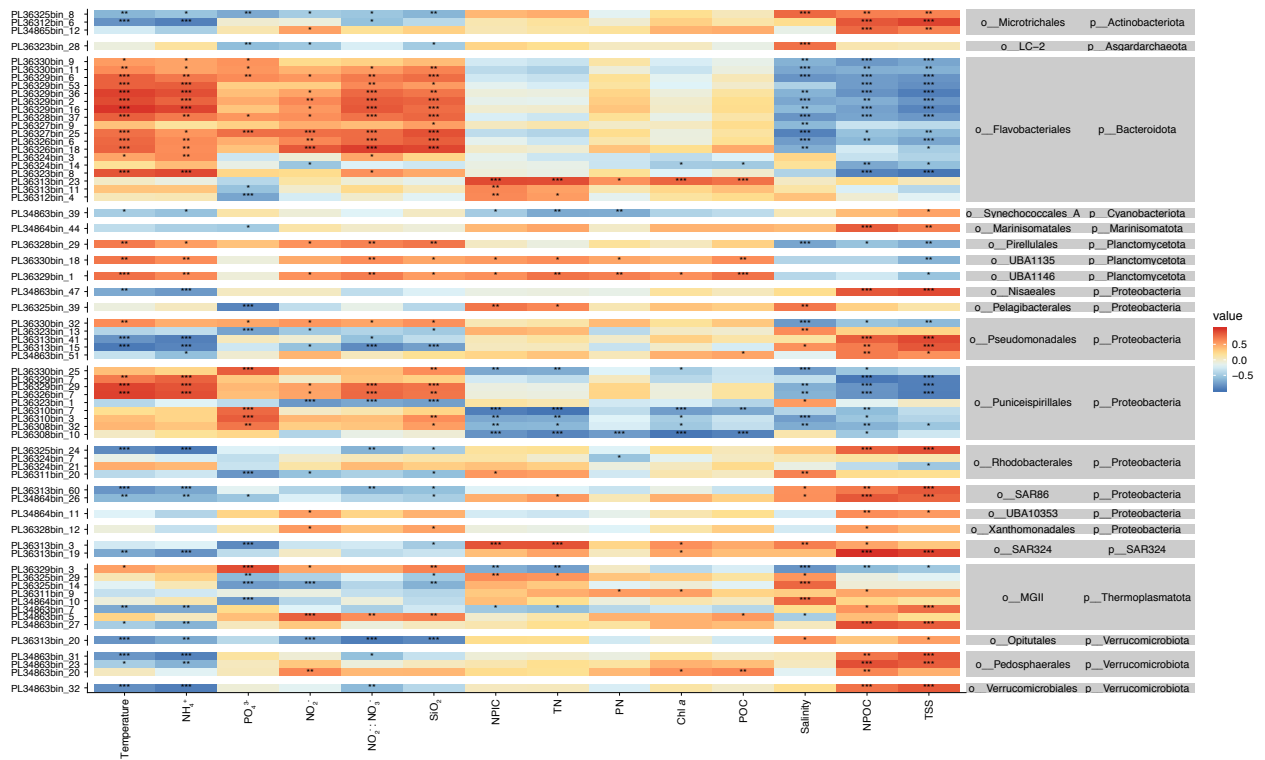

**Figure S11.** Correlation between the relative abundance of MAGs<sub>95%ANI</sub> and environmental parameters. Correlations are based on Spearman's rank correlation coefficient (negative correlations are indicated by values < 0, positive correlations are indicated by values > 0). Significant correlations are expressed as \* ( $p > 0.05$ ), \*\* ( $p > 0.01$ ), and \*\*\* ( $p > 0.001$ ).



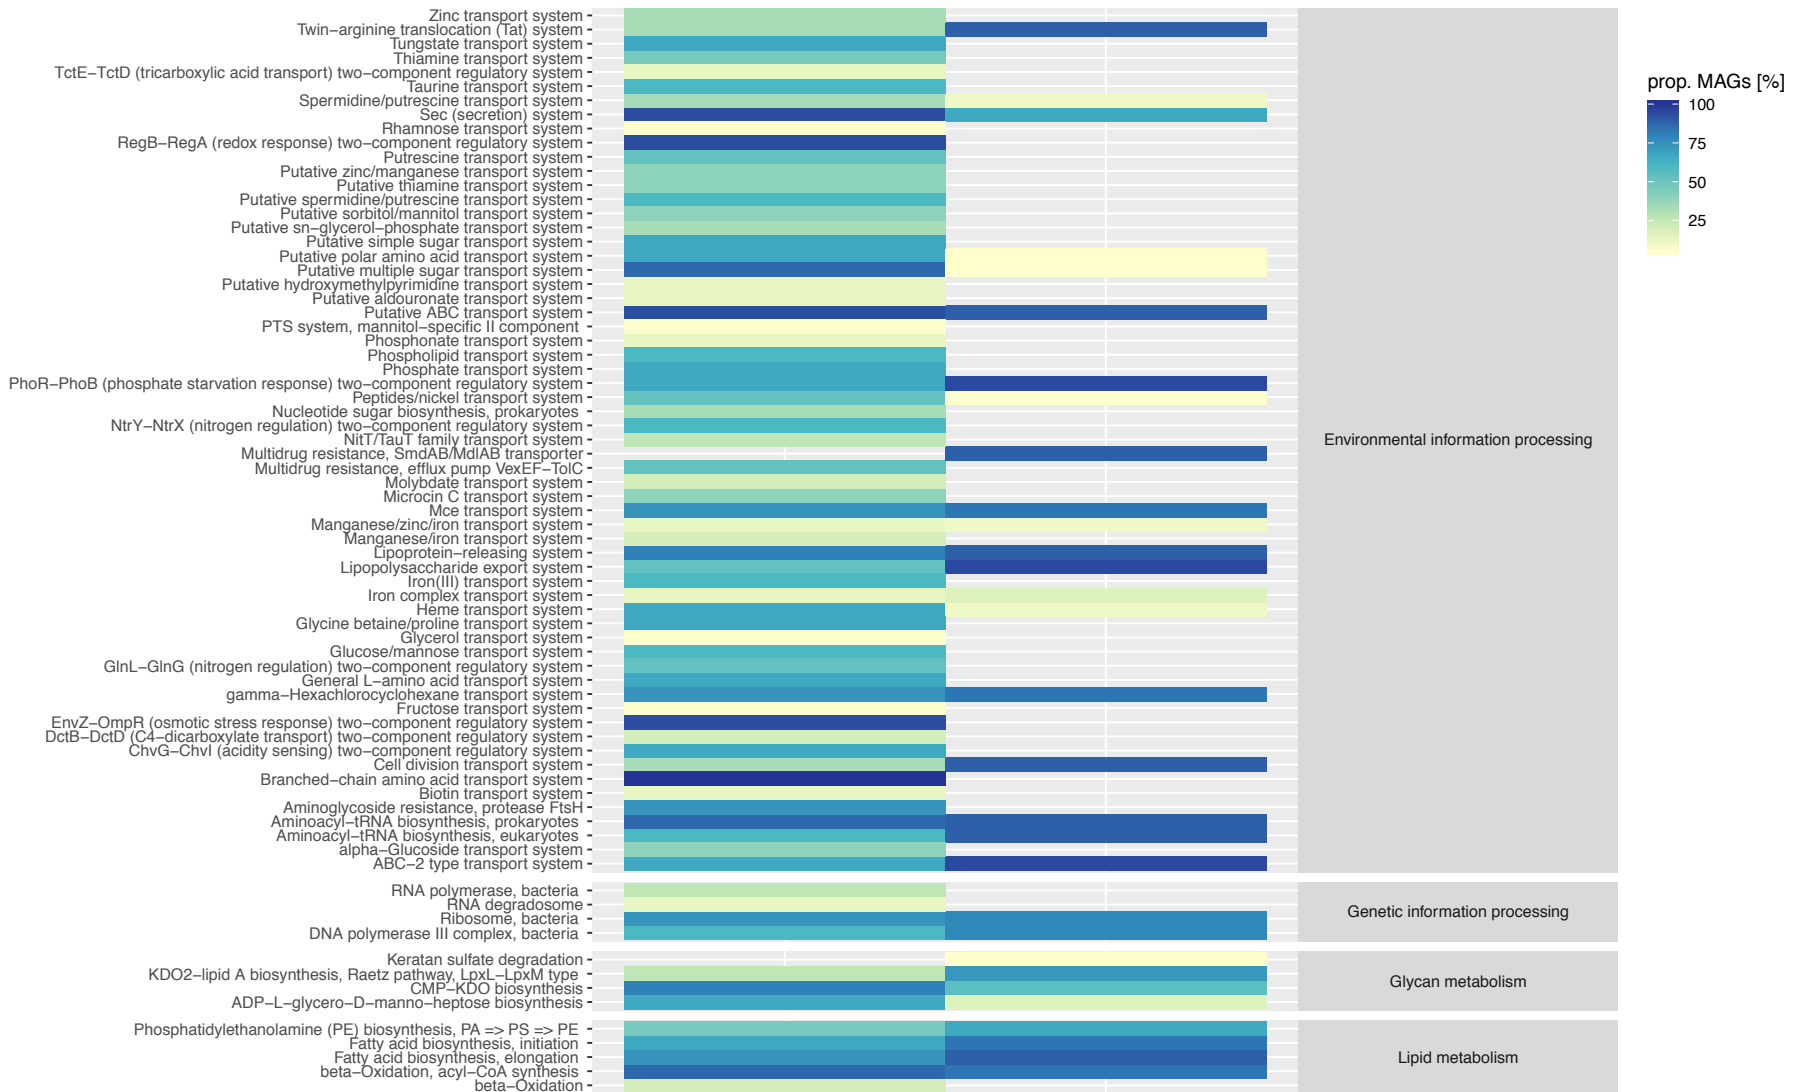

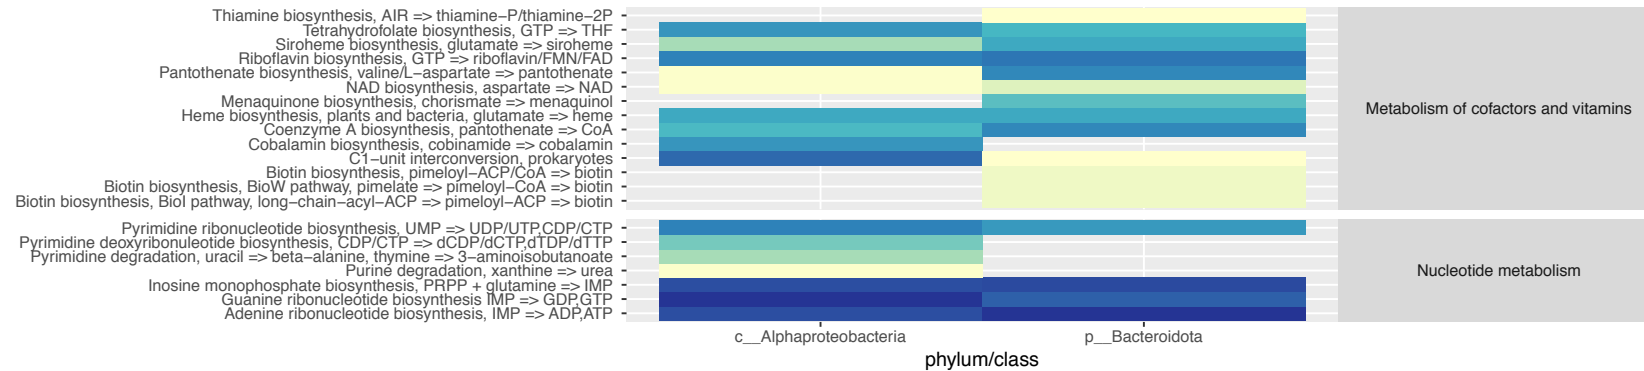

**Figure S12.** KEGG Modules of Alphaproteobacteria and Bacteroidota MAGs<sub>95%ANI</sub> derived from seawater. Colour indicates the number of MAGs<sub>95%ANI</sub> (in %) that were associated with individual KEGG Modules.

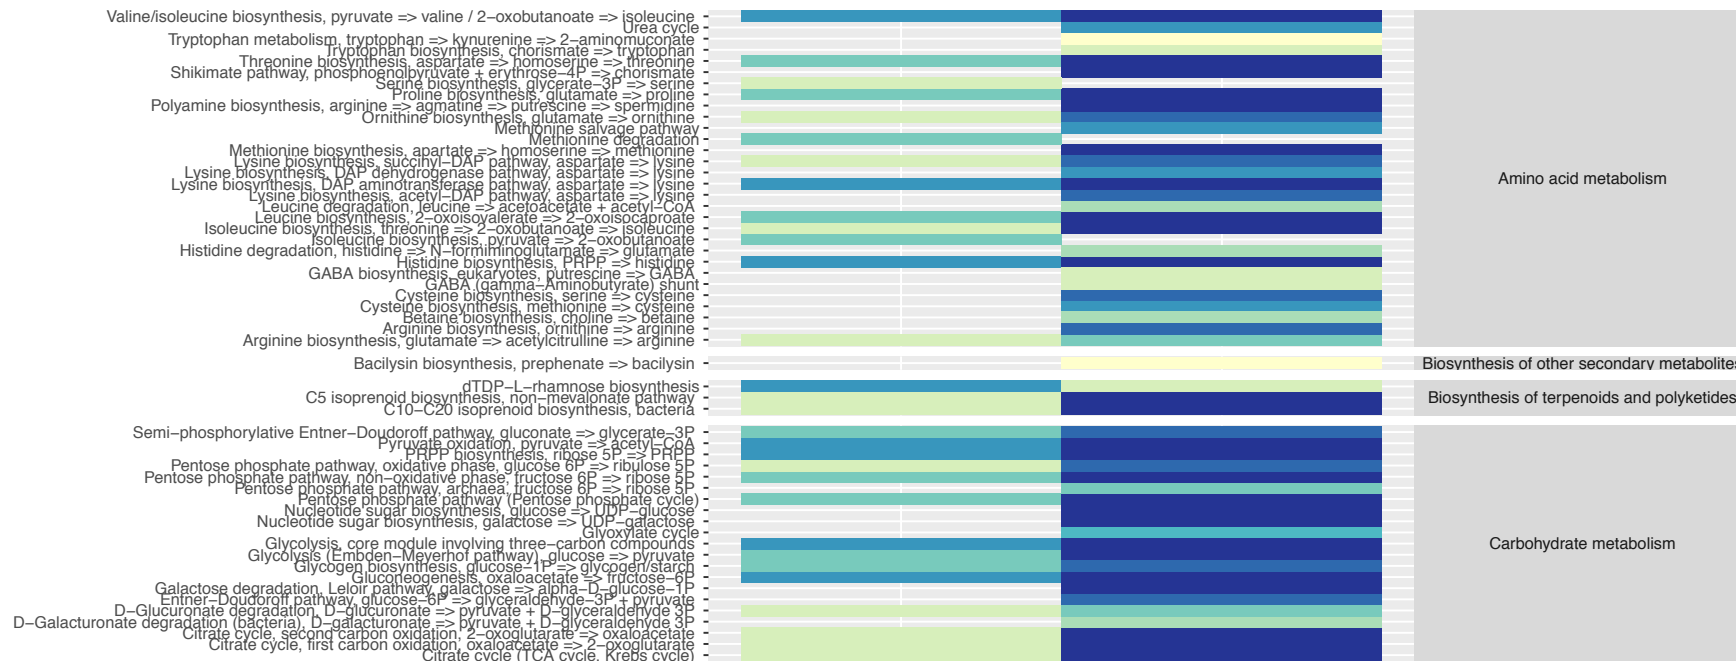



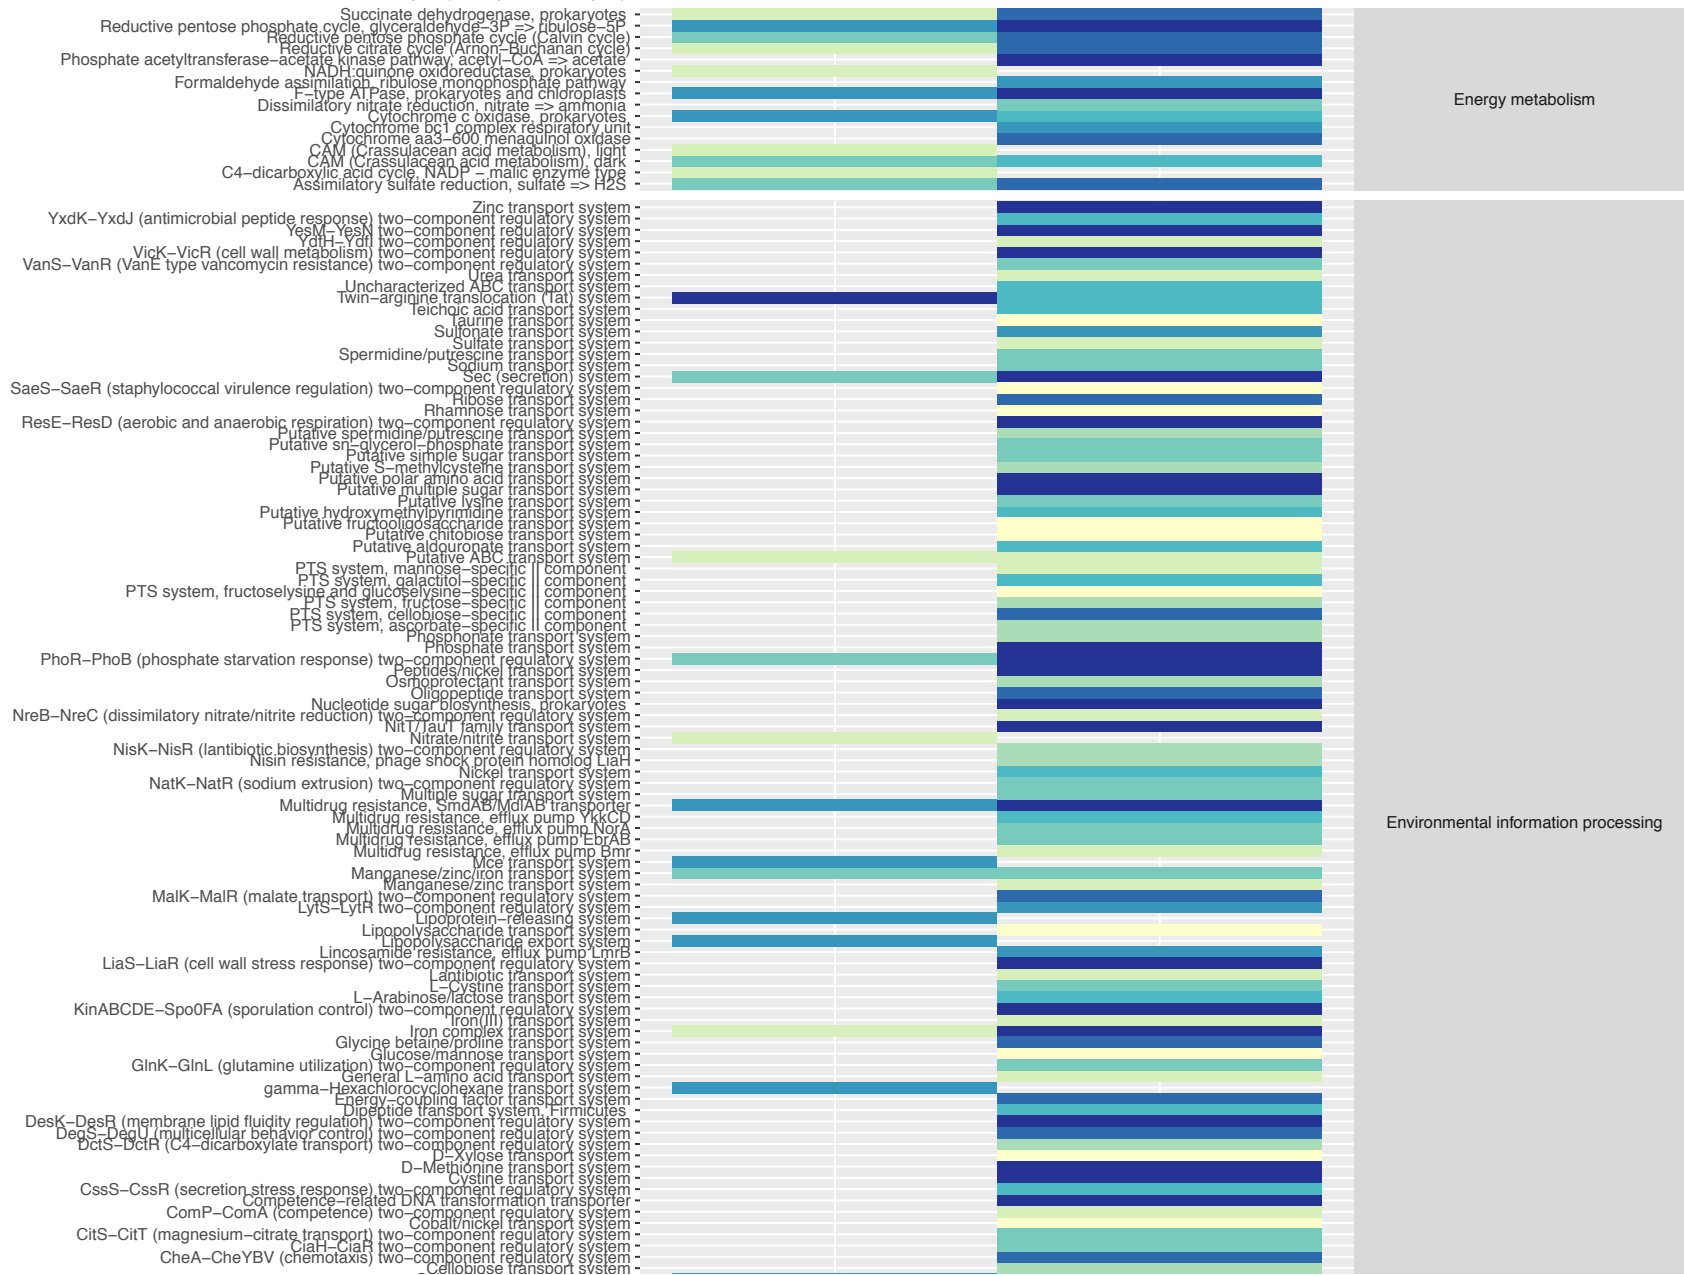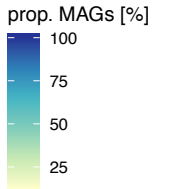

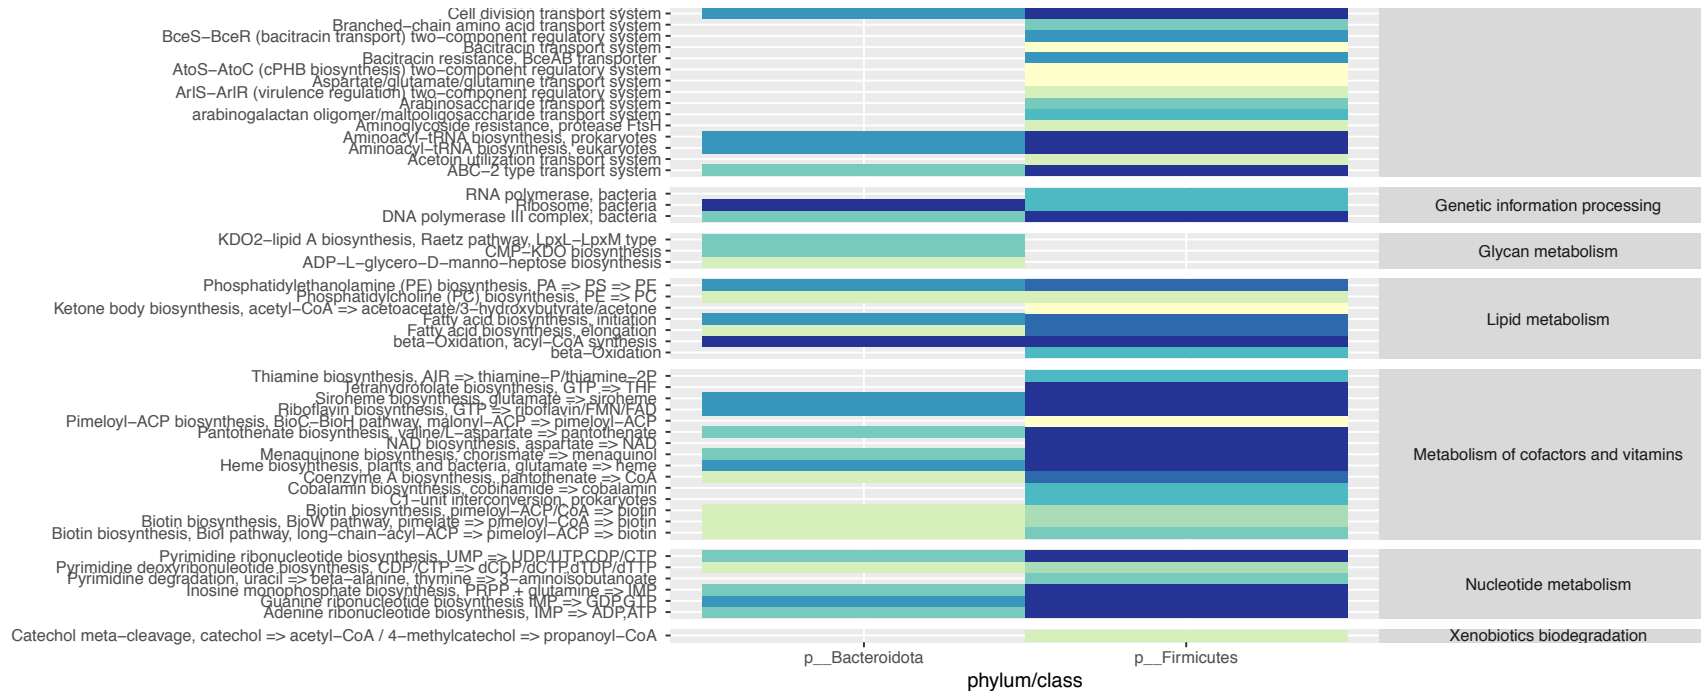

**Figure S13.** KEGG Modules of Bacteroidota and Firmicutes MAGs<sub>95%ANI</sub> derived from macroalgae. Colour indicates the number of MAGs<sub>95%ANI</sub> (in %) that were associated with individual KEGG Modules.

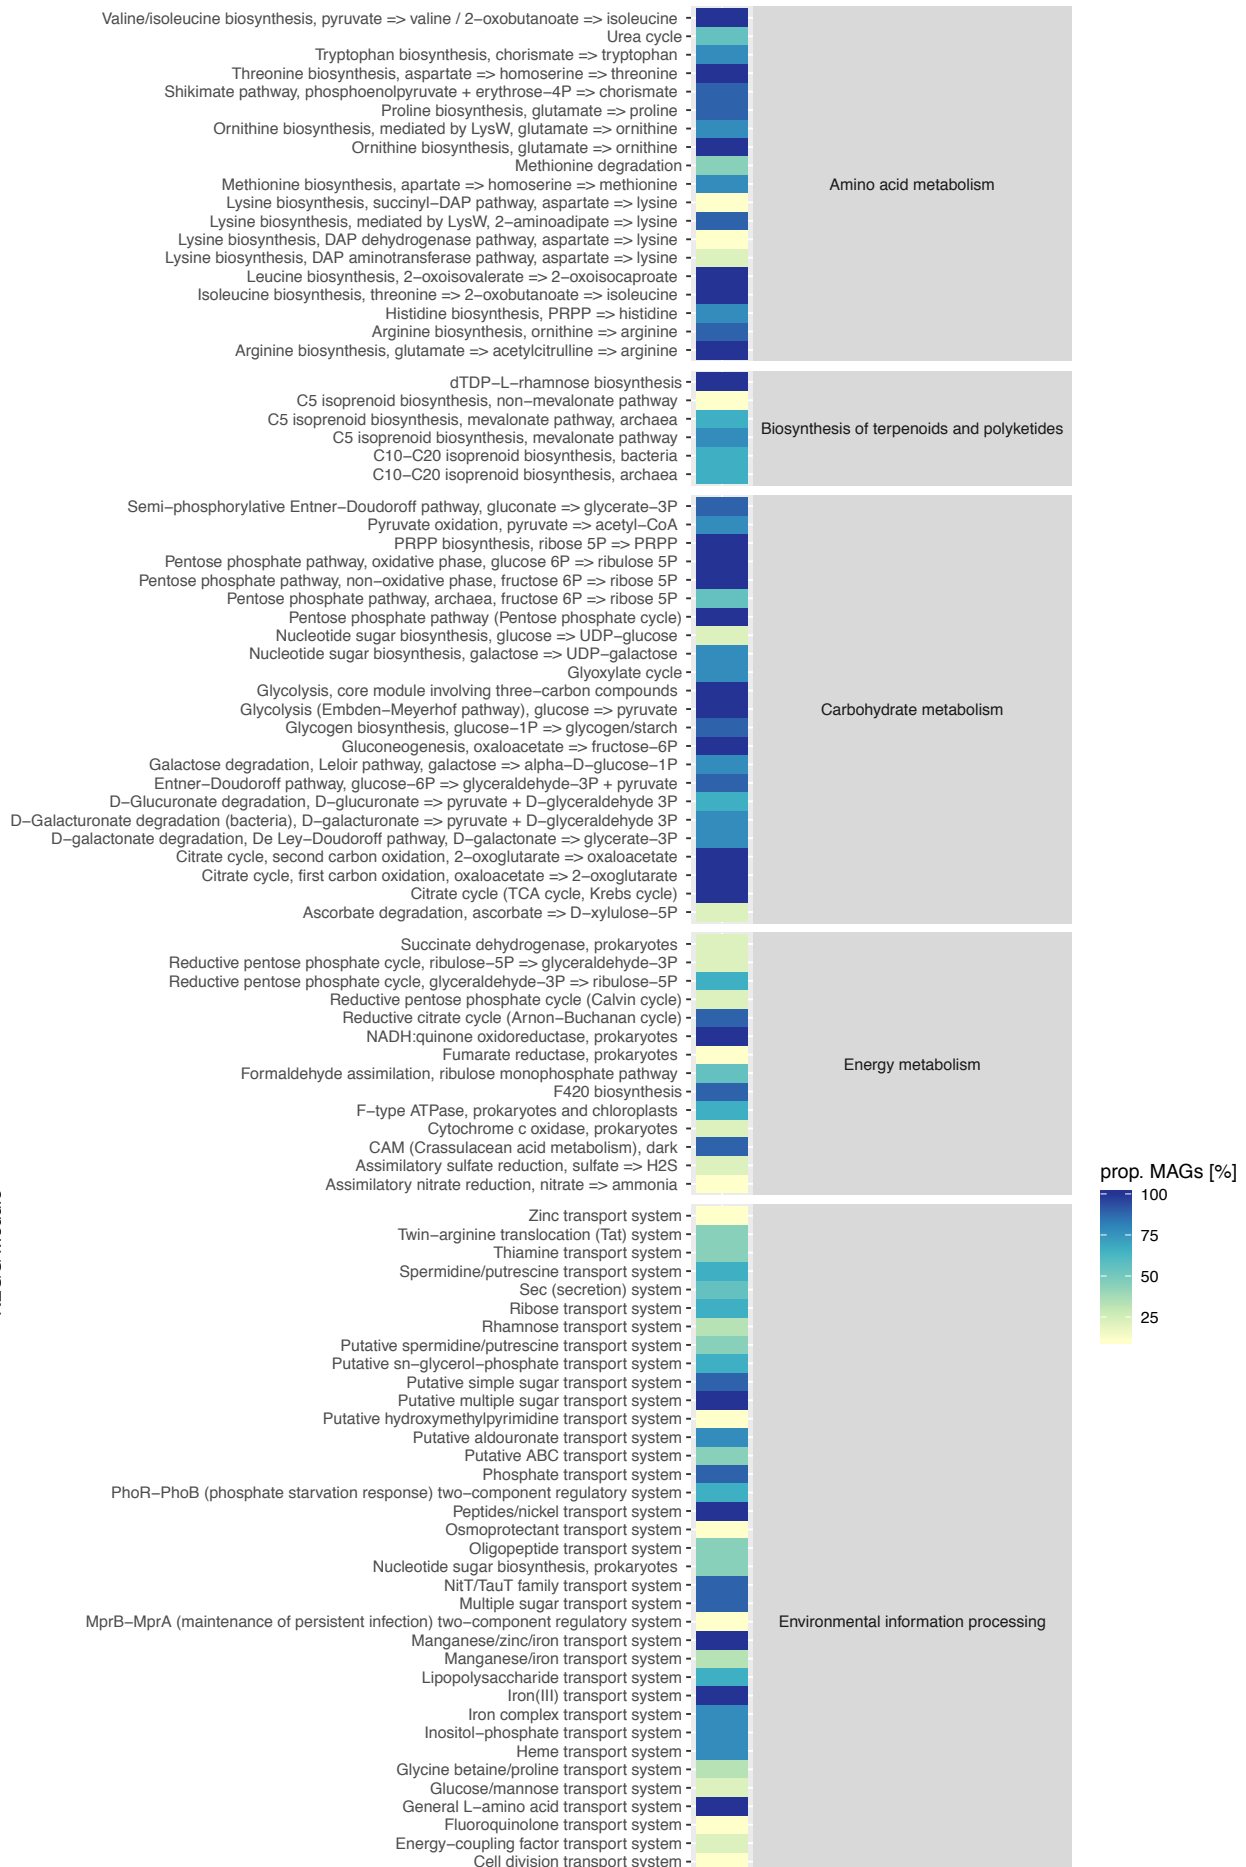

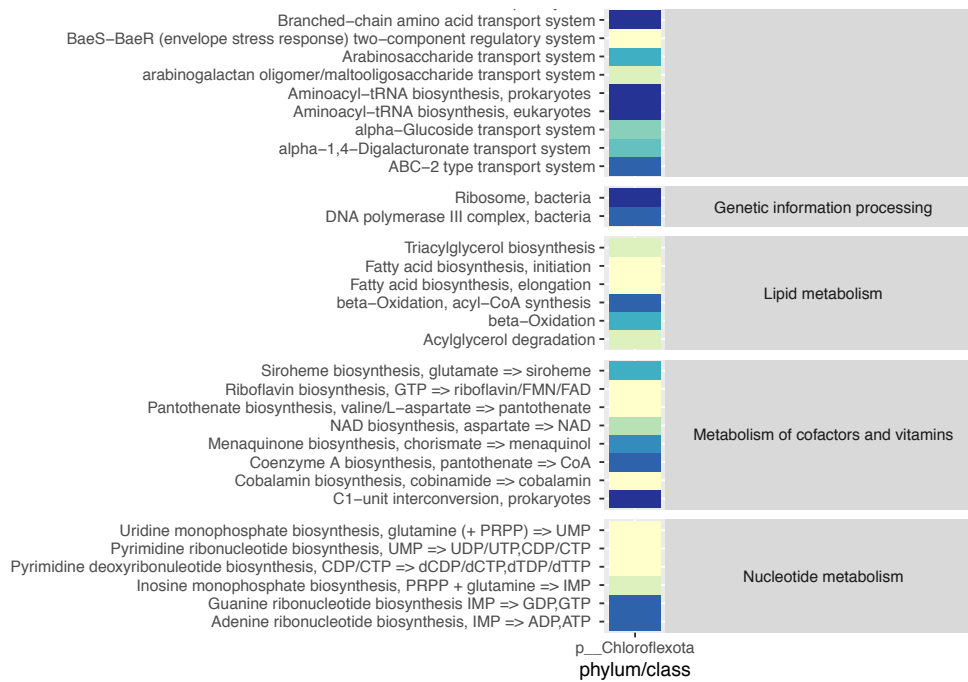

**Figure S14.** KEGG Modules of Chloroflexota MAGs<sub>95%ANI</sub> derived from the sponge *Coscinoderma matthewsi*. Colour indicates the number of MAGs<sub>95%ANI</sub> (in %) that were associated with individual KEGG Modules.

**Table S1.** Sample identifiers for the raw metagenome data at the Australian Microbiome data portal Initiative under the Australian Microbiome project. Raw sequencing data can be downloaded from <https://data.bioplatforms.com/organization/about/australian-microbiome>.

| Host/Habitat                  | Date sampled | Sample ID - microbial samples |       |       |
|-------------------------------|--------------|-------------------------------|-------|-------|
| seawater                      | 2016-06-08   | 34863                         | 34864 | 34865 |
| seawater                      | 2016-08-01   | 36308                         | 36309 | 36310 |
| seawater                      | 2016-10-10   | 36311                         | 36312 | 36313 |
| seawater                      | 2016-12-21   | 36323                         | 36324 | 36325 |
| seawater                      | 2017-02-20   | 36326                         | 36327 | 36328 |
| seawater                      | 2017-03-18   | 36329                         | 36330 | 36331 |
| <i>Coscinoderma matthewsi</i> | 2016-08-01   | 36386                         | 36387 | 36388 |
| <i>Coscinoderma matthewsi</i> | 2017-02-20   | 36404                         | 36405 | 36406 |
| <i>Sargassum</i> spp.         | 2016-08-01   | 36425                         | 36426 | 36427 |
| <i>Sargassum</i> spp.         | 2017-02-20   | 36439                         | 36440 | 36441 |

**Table S2.** Binning results prior to de-replication

| habitat    | nr of samples | bins total | bins with quality $\geq 50$ | Completeness (in %)   | Contamination (in %) | Total recovery (in %) |
|------------|---------------|------------|-----------------------------|-----------------------|----------------------|-----------------------|
| sponge     | 6             | 271        | 151                         | 84.01 ( $\pm 11.81$ ) | 1.97 ( $\pm 1.98$ )  | 63.5                  |
| macroalgae | 6             | 215        | 52                          | 79.65 ( $\pm 14.58$ ) | 2.04 ( $\pm 2.19$ )  | 27.7                  |
| seawater   | 18            | 1908       | 765                         | 76.47 ( $\pm 12.35$ ) | 1.47 ( $\pm 1.44$ )  | 35.2                  |

**Table S3.** Taxonomic affiliations of de-replicated MAGs (based on 95% Average Nucleotide Identity) using GTDB taxonomy.

a) Sponge MAGs<sub>95%ANI</sub>

| Bin_ID        | domain     | phylum             | class                 | order               | family              | genus             | species |
|---------------|------------|--------------------|-----------------------|---------------------|---------------------|-------------------|---------|
| CO36406bin_13 | d_Archaea  | p_Crenarchaeota    | c_Nitrososphaeria     | o_Nitrososphaerales | f_Nitrosopumilaceae | g_                |         |
| CO36404bin_3  | d_Bacteria | p_Chloroflexota    | c_Anaerolineae        | o_Caldilineales     | f_Caldilineaceae    | g_bin5            |         |
| CO36405bin_14 | d_Bacteria | p_Chloroflexota    | c_Anaerolineae        | o_Caldilineales     | f_Caldilineaceae    | g_bin5            |         |
| CO36388bin_16 | d_Bacteria | p_Chloroflexota    | c_Anaerolineae        | o_SBR1031           | f_A4b               | g_UBA6055         |         |
| CO36386bin_31 | d_Bacteria | p_Chloroflexota    | c_Anaerolineae        | o_SBR1031           | f_A4b               | g_UBA6055         |         |
| CO36386bin_32 | d_Bacteria | p_Chloroflexota    | c_Anaerolineae        | o_SBR1031           | f_A4b               | g_UBA6055         |         |
| CO36388bin_17 | d_Bacteria | p_Chloroflexota    | c_Anaerolineae        | o_SBR1031           | f_A4b               | g_UBA6055         |         |
| CO36386bin_4  | d_Bacteria | p_Chloroflexota    | c_Anaerolineae        | o_SBR1031           | f_A4b               | g_UBA6055         |         |
| CO36387bin_22 | d_Bacteria | p_Chloroflexota    | c_Anaerolineae        | o_SBR1031           | f_                  | g_                |         |
| CO36386bin_13 | d_Bacteria | p_Chloroflexota    | c_UBA2235             | o_UBA11872          | f_UBA11872          | g_                |         |
| CO36404bin_8  | d_Bacteria | p_Actinobacteriota | c_Acidimicrobiia      | o_bin76             | f_                  | g_                |         |
| CO36387bin_10 | d_Bacteria | p_Actinobacteriota | c_Acidimicrobiia      | o_bin76             | f_                  | g_                |         |
| CO36386bin_14 | d_Bacteria | p_Actinobacteriota | c_Acidimicrobiia      | o_Microtrichales    | f_TK06              | g_                |         |
| CO36406bin_26 | d_Bacteria | p_Cyanobacteriota  | c_Cyanobacteriia      | o_Synechococcales_A | f_Cyanobiaceae      | g_Synechococcus_C |         |
| CO36386bin_37 | d_Bacteria | p_Cyanobacteriota  | c_Cyanobacteriia      | o_Synechococcales_A | f_Cyanobiaceae      | g_Synechococcus_C |         |
| CO36386bin_29 | d_Bacteria | p_Cyanobacteriota  | c_Cyanobacteriia      | o_Synechococcales_A | f_Cyanobiaceae      | g_Synechococcus_C |         |
| CO36386bin_10 | d_Bacteria | p_Planctomycetota  | c_Planctomycetes      | o_Pirellulales      | f_Pirellulaceae     | g_Mariniblastus   |         |
| CO36387bin_4  | d_Bacteria | p_Planctomycetota  | c_Planctomycetes      | o_Pirellulales      | f_Pirellulaceae     | g_Rubripirellula  |         |
| CO36405bin_2  | d_Bacteria | p_Planctomycetota  | c_Planctomycetes      | o_Pirellulales      | f_UBA1268           | g_UBA1268         |         |
| CO36405bin_5  | d_Bacteria | p_Planctomycetota  | c_Planctomycetes      | o_Pirellulales      | f_UBA1268           | g_                |         |
| CO36404bin_19 | d_Bacteria | p_Acidobacteriota  | c_Luteitaleia         | o_Luteitaleales     | f_UBA8438           | g_                |         |
| CO36386bin_12 | d_Bacteria | p_Acidobacteriota  | c_Luteitaleia         | o_Luteitaleales     | f_UBA8438           | g_                |         |
| CO36388bin_9  | d_Bacteria | p_Acidobacteriota  | c_Thermoanaerobaculia | o_                  | f_                  | g_                |         |
| CO36388bin_1  | d_Bacteria | p_Acidobacteriota  | c_Thermoanaerobaculia | o_                  | f_                  | g_                |         |
| CO36406bin_18 | d_Bacteria | p_UBP10            | c_GR-WP33-30          | o_bin18             | f_bin18             | g_bin18           |         |
| CO36406bin_19 | d_Bacteria | p_UBP10            | c_GR-WP33-30          | o_bin18             | f_bin18             | g_                |         |
| CO36405bin_1  | d_Bacteria | p_Nitrospirota     | c_Nitrospiria         | o_Nitrospirales     | f_UBA8639           | g_bin75           |         |
| CO36386bin_35 | d_Bacteria | p_Nitrospirota     | c_UBA8248             | o_UBA8248           | f_UBA8248           | g_bin107          |         |
| CO36404bin_6  | d_Bacteria | p_Proteobacteria   | c_Alphaproteobacteria | o_UBA828            | f_                  | g_                |         |
| CO36404bin_4  | d_Bacteria | p_Proteobacteria   | c_Alphaproteobacteria | o_Rhodobacterales   | f_Rhodobacteraceae  | g_bin36           |         |
| CO36386bin_9  | d_Bacteria | p_Proteobacteria   | c_Alphaproteobacteria | o_bin65             | f_bin65             | g_bin65           |         |
| CO36386bin_3  | d_Bacteria | p_Proteobacteria   | c_Gammaproteobacteria | o_UBA10353          | f_LS-SOB            | g_                |         |
| CO36405bin_22 | d_Bacteria | p_Proteobacteria   | c_Gammaproteobacteria | o_UBA6522           | f_UBA6522           | g_                |         |
| CO36388bin_2  | d_Bacteria | p_Proteobacteria   | c_Gammaproteobacteria | o_UBA11654          | f_UBA11654          | g_                |         |
| CO36386bin_20 | d_Bacteria | p_Proteobacteria   | c_Gammaproteobacteria | o_                  | f_                  | g_                |         |
| CO36386bin_8  | d_Bacteria | p_Proteobacteria   | c_Gammaproteobacteria | o_Coxiellales       | f_Coxiellaceae      | g_                |         |
| CO36388bin_10 | d_Bacteria | p_Proteobacteria   | c_Gammaproteobacteria | o_Pseudomonadales   | f_HTCC2089          | g_bin55           |         |
| CO36404bin_7  | d_Bacteria | p_Proteobacteria   | c_Gammaproteobacteria | o_Pseudomonadales   | f_HTCC2089          | g_bin55           |         |

b) Macroalgae MAGs<sub>95%ANI</sub>

|               |            |                     |                       |                      |                         |                      |                           |
|---------------|------------|---------------------|-----------------------|----------------------|-------------------------|----------------------|---------------------------|
| SS36439bin_8  | d_Bacteria | p_Firmicutes        | c_Bacilli             | o_Bacillales         | f_Bacillaceae           | g_Bacillus           | s_Bacillus_licheniformis  |
| SS36439bin_9  | d_Bacteria | p_Firmicutes        | c_Bacilli             | o_Bacillales         | f_Bacillaceae_A         | g_Bacillus_AC        | s_Bacillus_AC_circulans_A |
| SS36440bin_1  | d_Bacteria | p_Firmicutes        | c_Bacilli             | o_Bacillales         | f_Bacillaceae_H         | g_Bacillus_C         | s_Bacillus_C_aryabhatai_A |
| SS36439bin_7  | d_Bacteria | p_Firmicutes        | c_Bacilli             | o_Bacillales         | f_Bacillaceae           | g_Bacillus           | s_                        |
| SS36441bin_5  | d_Bacteria | p_Firmicutes        | c_Bacilli             | o_Bacillales         | f_Bacillaceae           | g_Bacillus_AY        | s_Bacillus_AY_weihaiensis |
| SS36439bin_4  | d_Bacteria | p_Firmicutes        | c_Bacilli             | o_Bacillales         | f_Bacillaceae_H         | g_Bacillus_C         | s_Bacillus_C_megaterium   |
| SS36427bin_1  | d_Bacteria | p_Chloroflexota     | c_Anaerolineae        | o_Promineofilales    | f_                      | g_                   | s_                        |
| SS36439bin_2  | d_Bacteria | p_Actinobacteriota  | c_Actinobacteria      | o_Actinomycetales    | f_Demequinaceae         | g_                   | s_                        |
| SS36427bin_3  | d_Bacteria | p_Firmicutes        | c_Bacilli             | o_Bacillales         | f_Bacillaceae_A         | g_Bacillus_AC        | s_                        |
| SS36439bin_11 | d_Bacteria | p_Firmicutes        | c_Bacilli             | o_Bacillales         | f_Bacillaceae_A         | g_Bacillus_AK        | s_                        |
| SS36440bin_2  | d_Bacteria | p_Cyanobacteriota   | c_Cyanobacteriia      | o_Cyanobacteriales   | f_Coleofasciculaceae    | g_Moorea             | s_                        |
| SS36425bin_4  | d_Bacteria | p_Bacteroidota      | c_Bacteroidia         | o_Flavobacteriales   | f_Flavobacteriaceae     | g_Aquimarina         | s_                        |
| SS36427bin_21 | d_Bacteria | p_Bacteroidota      | c_Bacteroidia         | o_Flavobacteriales   | f_Flavobacteriaceae     | g_Aquimarina         | s_                        |
| SS36425bin_2  | d_Bacteria | p_Bacteroidota      | c_Bacteroidia         | o_Cytophagales       | f_Amoebophilaceae       | g_                   | s_                        |
| SS36425bin_5  | d_Bacteria | p_Bacteroidota      | c_Bacteroidia         | o_Cytophagales       | f_                      | g_                   | s_                        |
| SS36427bin_12 | d_Bacteria | p_Verrucomicrobiota | c_Verrucomicrobiae    | o_Verrucomicrobiales | f_Akkermansiaceae       | g_                   | s_                        |
| SS36427bin_6  | d_Bacteria | p_Spirochaetota     | c_Spirochaetia        | o_Spirochaetales     | f_Alkalispirochaetaceae | g_                   | s_                        |
| SS36427bin_2  | d_Bacteria | p_Proteobacteria    | c_Alphaproteobacteria | o_Rhizobiales        | f_                      | g_                   | s_                        |
| SS36439bin_6  | d_Bacteria | p_Proteobacteria    | c_Alphaproteobacteria | o_Sphingomonadales   | f_Sphingomonadaceae     | g_Altererythrobacter | s_                        |
| SS36439bin_13 | d_Bacteria | p_Proteobacteria    | c_Gammaproteobacteria | o_UBA10353           | f_                      | g_                   | s_                        |

c) Seawater MAGs<sub>95%ANI</sub>

|               |            |                     |                       |                      |                       |                   |                    |
|---------------|------------|---------------------|-----------------------|----------------------|-----------------------|-------------------|--------------------|
| PL34863bin_7  | d_Archaea  | p_Thermoplasmata    | c_MGII                | o_MGII               | f_MGIIIB              | g_UBA9562         | s_GCA_002696615.1  |
| PL34863bin_27 | d_Archaea  | p_Thermoplasmata    | c_MGII                | o_MGII               | f_MGIIIB              | g_UBA252          | s_GCA_001628435.1  |
| PL36323bin_28 | d_Archaea  | p_Asgardarchaeota   | c_Heimdallarchaeia    | o_LC-2               | f_LC-2                | g_GCA-2728275     | s_GCA_002728275.1  |
| PL34863bin_5  | d_Archaea  | p_Thermoplasmata    | c_MGII                | o_MGII               | f_MGIIIB              | g_UBA557          | s_                 |
| PL34864bin_10 | d_Archaea  | p_Thermoplasmata    | c_MGII                | o_MGII               | f_MGIIIB              | g_UBA11751        | s_                 |
| PL36325bin_14 | d_Archaea  | p_Thermoplasmata    | c_MGII                | o_MGII               | f_MGIIA               | g_UBA562          | s_                 |
| PL36329bin_3  | d_Archaea  | p_Thermoplasmata    | c_MGII                | o_MGII               | f_MGIIA               | g_UBA253          | s_                 |
| PL36325bin_29 | d_Archaea  | p_Thermoplasmata    | c_MGII                | o_MGII               | f_MGIIA               | g_UBA120          | s_                 |
| PL36311bin_9  | d_Archaea  | p_Thermoplasmata    | c_MGII                | o_MGII               | f_MGIIA               | g_UBA120          | s_                 |
| PL34865bin_12 | d_Bacteria | p_Actinobacteriota  | c_Acidimicrobiia      | o_Microtrichales     | f_UBA11606            | g_MedAcidi-G2A    | s_MedAcidi-G2A sp3 |
| PL36330bin_20 | d_Bacteria | p_Proteobacteria    | c_Gammaproteobacteria | o_Pseudomonadales    | f_Haliaceae           | g_Luminiphilus    | s_GCA_002703585.1  |
| PL36330bin_32 | d_Bacteria | p_Proteobacteria    | c_Gammaproteobacteria | o_Pseudomonadales    | f_Litoricolaceae      | g_Litoricola      | s_GCF_000227525.1  |
| PL36311bin_20 | d_Bacteria | p_Proteobacteria    | c_Alphaproteobacteria | o_Rhodobacterales    | f_Rhodobacteraceae    | g_TMED111         | s_TMED111 sp1      |
| PL36325bin_24 | d_Bacteria | p_Proteobacteria    | c_Alphaproteobacteria | o_Rhodobacterales    | f_Rhodobacteraceae    | g_TMED111         | s_                 |
| PL36325bin_8  | d_Bacteria | p_Actinobacteriota  | c_Acidimicrobiia      | o_Microtrichales     | f_UBA11606            | g_UBA11606        | s_GCA_002690205.1  |
| PL36324bin_7  | d_Bacteria | p_Proteobacteria    | c_Alphaproteobacteria | o_Rhodobacterales    | f_Rhodobacteraceae    | g_HIMB11          | s_GCA_001510135.1  |
| PL36313bin_3  | d_Bacteria | p_SAR324            | c_SAR324              | o_SAR324             | f_NAC60-12            | g_UBA1014         | s_UBA1014 sp2      |
| PL36323bin_1  | d_Bacteria | p_Proteobacteria    | c_Alphaproteobacteria | o_Puniceispirillales | f_Puniceispirillaceae | g_UBA8309         | s_UBA8309 sp3      |
| PL34863bin_47 | d_Bacteria | p_Proteobacteria    | c_Alphaproteobacteria | o_Nisaeales          | f_Nisaeaceae          | g_GCA-002701455   | s_GCA_002690995.1  |
| PL36312bin_6  | d_Bacteria | p_Actinobacteriota  | c_Acidimicrobiia      | o_Microtrichales     | f_Illumatobacteraceae | g_Casp-actino5    | s_                 |
| PL34863bin_39 | d_Bacteria | p_Cyanobacteriota   | c_Cyanobacteriia      | o_Synechococcales_A  | f_Cyanobiaceae        | g_Synechococcus_C | s_                 |
| PL36324bin_3  | d_Bacteria | p_Bacteroidota      | c_Bacteroidia         | o_Flavobacteriales   | f_Cryomorphaceae      | g_UBA10364        | s_                 |
| PL36326bin_6  | d_Bacteria | p_Bacteroidota      | c_Bacteroidia         | o_Flavobacteriales   | f_Cryomorphaceae      | g_UBA10364        | s_                 |
| PL36329bin_53 | d_Bacteria | p_Bacteroidota      | c_Bacteroidia         | o_Flavobacteriales   | f_Flavobacteriaceae   | g_MED-G14         | s_                 |
| PL36327bin_25 | d_Bacteria | p_Bacteroidota      | c_Bacteroidia         | o_Flavobacteriales   | f_Flavobacteriaceae   | g_MS024-2A        | s_                 |
| PL36330bin_9  | d_Bacteria | p_Bacteroidota      | c_Bacteroidia         | o_Flavobacteriales   | f_Flavobacteriaceae   | g_MS024-2A        | s_                 |
| PL36330bin_11 | d_Bacteria | p_Bacteroidota      | c_Bacteroidia         | o_Flavobacteriales   | f_Flavobacteriaceae   | g_MS024-2A        | s_                 |
| PL36329bin_6  | d_Bacteria | p_Bacteroidota      | c_Bacteroidia         | o_Flavobacteriales   | f_Flavobacteriaceae   | g_MS024-2A        | s_                 |
| PL36324bin_14 | d_Bacteria | p_Bacteroidota      | c_Bacteroidia         | o_Flavobacteriales   | f_Flavobacteriaceae   | g_MS024-2A        | s_                 |
| PL36329bin_16 | d_Bacteria | p_Bacteroidota      | c_Bacteroidia         | o_Flavobacteriales   | f_Flavobacteriaceae   | g_MS024-2A        | s_                 |
| PL36329bin_2  | d_Bacteria | p_Bacteroidota      | c_Bacteroidia         | o_Flavobacteriales   | f_Flavobacteriaceae   | g_MS024-2A        | s_                 |
| PL36323bin_8  | d_Bacteria | p_Bacteroidota      | c_Bacteroidia         | o_Flavobacteriales   | f_Flavobacteriaceae   | g_MS024-2A        | s_                 |
| PL36326bin_18 | d_Bacteria | p_Bacteroidota      | c_Bacteroidia         | o_Flavobacteriales   | f_Flavobacteriaceae   | g_BAC121          | s_                 |
| PL36327bin_9  | d_Bacteria | p_Bacteroidota      | c_Bacteroidia         | o_Flavobacteriales   | f_Flavobacteriaceae   | g_UBA3478         | s_                 |
| PL36313bin_11 | d_Bacteria | p_Bacteroidota      | c_Bacteroidia         | o_Flavobacteriales   | f_UA16                | g_UBA8752         | s_                 |
| PL36328bin_37 | d_Bacteria | p_Bacteroidota      | c_Bacteroidia         | o_Flavobacteriales   | f_UA16                | g_UBA11663        | s_                 |
| PL36329bin_36 | d_Bacteria | p_Bacteroidota      | c_Bacteroidia         | o_Flavobacteriales   | f_UA16                | g_UBA11663        | s_                 |
| PL36312bin_4  | d_Bacteria | p_Bacteroidota      | c_Bacteroidia         | o_Flavobacteriales   | f_Crocinitomicaceae   | g_UBA952          | s_                 |
| PL36313bin_23 | d_Bacteria | p_Bacteroidota      | c_Bacteroidia         | o_Flavobacteriales   | f_UBA10066            | g_                | s_                 |
| PL34864bin_44 | d_Bacteria | p_Marinisomatota    | c_Marinisomatia       | o_Marinisomatales    | f_Marinisomataceae    | g_Marinisoma      | s_                 |
| PL36330bin_18 | d_Bacteria | p_Plantomycetota    | c_UBA1135             | o_UBA1135            | f_GCA-002686595       | g_GCA-2686945     | s_                 |
| PL36329bin_1  | d_Bacteria | p_Plantomycetota    | c_UBA8108             | o_UBA1146            | f_UBA1146             | g_UBA12191        | s_                 |
| PL36328bin_29 | d_Bacteria | p_Plantomycetota    | c_Plantomycetes       | o_Pirellulales       | f_Pirellulaceae       | g_Rubripirellula  | s_                 |
| PL36313bin_20 | d_Bacteria | p_Verrucomicrobiota | c_Verrucomicrobiae    | o_Opitutales         | f_Puniceicoccaceae    | g_GCA-2690565     | s_                 |
| PL34863bin_23 | d_Bacteria | p_Verrucomicrobiota | c_Verrucomicrobiae    | o_Pedosphaerales     | f_UBA1096             | g_UBA1096         | s_                 |
| PL34863bin_20 | d_Bacteria | p_Verrucomicrobiota | c_Verrucomicrobiae    | o_Pedosphaerales     | f_UBA1100             | g_UBA1100         | s_                 |
| PL34863bin_31 | d_Bacteria | p_Verrucomicrobiota | c_Verrucomicrobiae    | o_Pedosphaerales     | f_                    | g_                | s_                 |
| PL34863bin_32 | d_Bacteria | p_Verrucomicrobiota | c_Verrucomicrobiae    | o_Verrucomicrobiales | f_DEV007              | g_EC70            | s_                 |
| PL36313bin_19 | d_Bacteria | p_SAR324            | c_SAR324              | o_SAR324             | f_NAC60-12            | g_JCVI-SCAAA005   | s_                 |
| PL36325bin_39 | d_Bacteria | p_Proteobacteria    | c_Alphaproteobacteria | o_Pelagibacterales   | f_Pelagibacteraceae   | g_Pelagibacter    | s_                 |
| PL36310bin_3  | d_Bacteria | p_Proteobacteria    | c_Alphaproteobacteria | o_Puniceispirillales | f_UBA1172             | g_                | s_                 |
| PL36330bin_25 | d_Bacteria | p_Proteobacteria    | c_Alphaproteobacteria | o_Puniceispirillales | f_Puniceispirillaceae | g_UBA8309         | s_                 |
| PL36329bin_7  | d_Bacteria | p_Proteobacteria    | c_Alphaproteobacteria | o_Puniceispirillales | f_Puniceispirillaceae | g_                | s_                 |
| PL36310bin_7  | d_Bacteria | p_Proteobacteria    | c_Alphaproteobacteria | o_Puniceispirillales | f_Puniceispirillaceae | g_                | s_                 |
| PL36329bin_29 | d_Bacteria | p_Proteobacteria    | c_Alphaproteobacteria | o_Puniceispirillales | f_Puniceispirillaceae | g_                | s_                 |
| PL36308bin_32 | d_Bacteria | p_Proteobacteria    | c_Alphaproteobacteria | o_Puniceispirillales | f_Puniceispirillaceae | g_                | s_                 |
| PL36326bin_7  | d_Bacteria | p_Proteobacteria    | c_Alphaproteobacteria | o_Puniceispirillales | f_Puniceispirillaceae | g_                | s_                 |
| PL36308bin_10 | d_Bacteria | p_Proteobacteria    | c_Alphaproteobacteria | o_Puniceispirillales | f_Puniceispirillaceae | g_                | s_                 |
| PL36324bin_21 | d_Bacteria | p_Proteobacteria    | c_Alphaproteobacteria | o_Rhodobacterales    | f_Rhodobacteraceae    | g_HIMB11          | s_                 |
| PL34864bin_26 | d_Bacteria | p_Proteobacteria    | c_Gammaproteobacteria | o_SAR86              | f_D2472               | g_                | s_                 |
| PL36313bin_60 | d_Bacteria | p_Proteobacteria    | c_Gammaproteobacteria | o_SAR86              | f_SAR86               | g_GCA-2707915     | s_                 |
| PL34864bin_11 | d_Bacteria | p_Proteobacteria    | c_Gammaproteobacteria | o_UBA10353           | f_LS-SOB              | g_UBA5682         | s_                 |
| PL36328bin_12 | d_Bacteria | p_Proteobacteria    | c_Gammaproteobacteria | o_Xanthomonadales    | f_                    | g_                | s_                 |
| PL36313bin_15 | d_Bacteria | p_Proteobacteria    | c_Gammaproteobacteria | o_Pseudomonadales    | f_Pseudohongiellaceae | g_UBA9145         | s_                 |
| PL36323bin_13 | d_Bacteria | p_Proteobacteria    | c_Gammaproteobacteria | o_Pseudomonadales    | f_Haliaceae           | g_Luminiphilus    | s_                 |
| PL36313bin_41 | d_Bacteria | p_Proteobacteria    | c_Gammaproteobacteria | o_Pseudomonadales    | f_Haliaceae           | g_Luminiphilus    | s_                 |
| PL34863bin_51 | d_Bacteria | p_Proteobacteria    | c_Gammaproteobacteria | o_Pseudomonadales    | f_Haliaceae           | g_Luminiphilus    | s_                 |

**Supplementary Table S4.** Statistical output of differential abundance analysis (DESeq) highlighting significantly enriched microbial phyla (class for Proteobacteria) in a) sponge, b) macroalgae, and c) seawater microbiomes between winter and summer.

a) Sponge microbiome

| phylum.class     | baseMean | log2FoldChange | lfcSE    | stat     | pvalue   | padj     |
|------------------|----------|----------------|----------|----------|----------|----------|
| p__Chloroflexota | 16850339 | -3.993485      | 0.844069 | -4.73123 | 2.23E-06 | 2.45E-05 |

b) macroalgae microbiome

| phylum.class           | baseMean    | log2FoldChange | lfcSE     | stat       | pvalue   | padj     |
|------------------------|-------------|----------------|-----------|------------|----------|----------|
| c__Alphaproteobacteria | 276990.52   | -2.311277      | 0.6133642 | -3.768197  | 1.64E-04 | 2.47E-04 |
| c__Gammaproteobacteria | 43427.11    | 19.48362       | 1.0783512 | 18.067973  | 5.70E-73 | 2.56E-72 |
| p__Actinobacteriota    | 47004.16    | 1.526713       | 0.6728611 | 2.268986   | 2.33E-02 | 2.33E-02 |
| p__Bacteroidota        | 488327.3    | -9.193737      | 2.2798199 | -4.032659  | 5.51E-05 | 9.93E-05 |
| p__Chloroflexota       | 81121.98    | -7.093359      | 2.6293516 | -2.69776   | 6.98E-03 | 8.98E-03 |
| p__Cyanobacteriota     | 466645.65   | 22.769968      | 1.2215184 | 18.640709  | 1.50E-77 | 1.35E-76 |
| p__Firmicutes          | 12566031.97 | 6.072401       | 2.4164859 | 2.512906   | 1.20E-02 | 1.35E-02 |
| p__Spirochaetota       | 28686.83    | -30            | 3.9067681 | -7.678982  | 1.60E-14 | 3.61E-14 |
| p__Verrucomicrobiota   | 64297.23    | -18.980284     | 1.3903511 | -13.651432 | 1.98E-42 | 5.94E-42 |

c) seawater

| phylum.class           | baseMean  | log2FoldChange | lfcSE     | stat      | pvalue   | padj     |
|------------------------|-----------|----------------|-----------|-----------|----------|----------|
| c__Alphaproteobacteria | 3235902   | -0.3797838     | 0.1126066 | -3.372661 | 7.44E-04 | 1.17E-03 |
| p__Bacteroidota        | 4718048.6 | 1.0013896      | 0.1693244 | 5.914031  | 3.34E-09 | 1.16E-08 |
| p__Cyanobacteriota     | 140817.2  | -1.1383357     | 0.2267763 | -5.019642 | 5.18E-07 | 1.14E-06 |
| p__Marinisomatota      | 303744.4  | 1.1451393      | 0.2831123 | 4.044823  | 5.24E-05 | 9.60E-05 |
| p__Planctomycetota     | 347855.5  | 3.1608062      | 0.1561974 | 20.235969 | 4.72E-91 | 5.19E-90 |
| p__SAR324              | 180286.2  | 0.7702925      | 0.1085726 | 7.094722  | 1.30E-12 | 7.13E-12 |
| p__Thermoplasmata      | 674037    | -0.4235043     | 0.151861  | -2.788762 | 5.29E-03 | 7.28E-03 |
| p__Verrucomicrobiota   | 325162.6  | -0.6196964     | 0.1054822 | -5.874888 | 4.23E-09 | 1.16E-08 |

**Table S5.** Planktonic Bacteroidota MAGs<sub>95%ANI</sub> and the presence of GH families (CAZy database).

| Bin_ID        | GH16 | GH37 | GH33 | GH30_1 | GH13 | GH17 | GH29 | GH53 | GH5 | GH2 | GH95 | GH18 | GH1 | GH30 | GH65 | GH97 | GH113 | GH63 | GH73 | GH13_36 | GH43_18 | GH5_13 |   |
|---------------|------|------|------|--------|------|------|------|------|-----|-----|------|------|-----|------|------|------|-------|------|------|---------|---------|--------|---|
| PL36312bin_4  | 0    | 0    | 0    | 0      | 0    | 0    | 0    | 0    | 0   | 0   | 0    | 0    | 1   | 1    | 1    | 0    | 0     | 0    | 0    | 0       | 0       | 0      | 0 |
| PL36313bin_11 | 0    | 0    | 0    | 0      | 0    | 0    | 0    | 1    | 0   | 2   | 0    | 0    | 0   | 0    | 0    | 0    | 0     | 0    | 0    | 0       | 0       | 0      | 0 |
| PL36313bin_23 | 0    | 0    | 0    | 0      | 0    | 0    | 0    | 0    | 0   | 1   | 0    | 0    | 1   | 0    | 0    | 0    | 0     | 0    | 0    | 1       | 0       | 0      | 0 |
| PL36323bin_8  | 2    | 0    | 1    | 0      | 0    | 0    | 2    | 0    | 0   | 0   | 0    | 1    | 0   | 0    | 0    | 0    | 0     | 0    | 0    | 0       | 0       | 0      | 0 |
| PL36324bin_14 | 1    | 0    | 1    | 0      | 0    | 0    | 1    | 0    | 0   | 0   | 0    | 0    | 0   | 0    | 0    | 0    | 0     | 0    | 0    | 0       | 0       | 0      | 1 |
| PL36324bin_3  | 0    | 0    | 1    | 1      | 1    | 2    | 0    | 1    | 1   | 0   | 0    | 0    | 0   | 0    | 0    | 0    | 0     | 0    | 0    | 0       | 0       | 0      | 0 |
| PL36326bin_18 | 0    | 0    | 0    | 1      | 1    | 2    | 0    | 0    | 0   | 0   | 0    | 0    | 0   | 0    | 0    | 0    | 0     | 0    | 0    | 0       | 0       | 0      | 0 |
| PL36326bin_6  | 0    | 1    | 0    | 1      | 0    | 0    | 0    | 1    | 1   | 0   | 0    | 0    | 0   | 0    | 0    | 1    | 0     | 0    | 0    | 0       | 0       | 0      | 0 |
| PL36327bin_25 | 2    | 1    | 0    | 1      | 1    | 0    | 0    | 0    | 0   | 0   | 1    | 0    | 0   | 0    | 1    | 0    | 0     | 0    | 0    | 0       | 0       | 0      | 0 |
| PL36327bin_9  | 1    | 0    | 1    | 0      | 0    | 0    | 1    | 0    | 0   | 0   | 0    | 0    | 0   | 1    | 0    | 0    | 1     | 0    | 0    | 0       | 0       | 1      | 0 |
| PL36328bin_37 | 0    | 0    | 0    | 0      | 0    | 0    | 0    | 0    | 0   | 0   | 0    | 0    | 0   | 0    | 0    | 0    | 0     | 0    | 0    | 0       | 0       | 0      | 0 |
| PL36329bin_16 | 2    | 1    | 0    | 1      | 1    | 0    | 0    | 1    | 0   | 0   | 0    | 0    | 0   | 0    | 0    | 1    | 0     | 1    | 0    | 0       | 0       | 0      | 0 |
| PL36329bin_2  | 2    | 1    | 0    | 0      | 0    | 0    | 0    | 0    | 0   | 0   | 0    | 0    | 0   | 0    | 0    | 0    | 0     | 0    | 0    | 0       | 0       | 0      | 0 |
| PL36329bin_36 | 0    | 0    | 1    | 0      | 0    | 0    | 0    | 0    | 0   | 0   | 0    | 0    | 0   | 0    | 0    | 0    | 0     | 0    | 0    | 0       | 0       | 0      | 0 |
| PL36329bin_53 | 1    | 0    | 0    | 0      | 0    | 0    | 0    | 0    | 0   | 0   | 0    | 1    | 0   | 0    | 0    | 0    | 0     | 0    | 0    | 0       | 0       | 0      | 0 |
| PL36329bin_6  | 1    | 1    | 0    | 0      | 0    | 0    | 0    | 0    | 0   | 0   | 1    | 0    | 0   | 0    | 0    | 0    | 0     | 0    | 0    | 0       | 0       | 0      | 0 |
| PL36330bin_11 | 1    | 0    | 0    | 0      | 0    | 0    | 0    | 0    | 1   | 0   | 0    | 0    | 0   | 0    | 0    | 0    | 0     | 0    | 0    | 0       | 1       | 0      | 0 |
| PL36330bin_9  | 2    | 1    | 0    | 0      | 0    | 0    | 0    | 0    | 1   | 0   | 1    | 0    | 0   | 0    | 0    | 0    | 0     | 0    | 0    | 0       | 0       | 0      | 0 |



**Table S6.** Planktonic Bacteriodota MAGs<sub>95%ANI</sub> and the presence of SusD-like genes (Pfam database).

| Bin_ID        | PF07980.10 | PF12741.6 | PF14322.5 | PF12771.6 |
|---------------|------------|-----------|-----------|-----------|
| PL36312bin_4  | 2          | 0         | 2         | 0         |
| PL36313bin_11 | 2          | 1         | 3         | 2         |
| PL36313bin_23 | 2          | 1         | 2         | 1         |
| PL36323bin_8  | 1          | 2         | 3         | 2         |
| PL36324bin_14 | 4          | 1         | 5         | 2         |
| PL36324bin_3  | 2          | 1         | 3         | 1         |
| PL36326bin_18 | 2          | 1         | 2         | 1         |
| PL36326bin_6  | 4          | 3         | 6         | 3         |
| PL36327bin_25 | 5          | 0         | 6         | 3         |
| PL36327bin_9  | 3          | 1         | 3         | 1         |
| PL36328bin_37 | 2          | 0         | 1         | 0         |
| PL36329bin_16 | 8          | 1         | 7         | 3         |
| PL36329bin_2  | 5          | 1         | 4         | 2         |
| PL36329bin_36 | 2          | 0         | 2         | 0         |
| PL36329bin_53 | 1          | 1         | 2         | 1         |
| PL36329bin_6  | 4          | 2         | 5         | 2         |
| PL36330bin_11 | 2          | 2         | 5         | 3         |
| PL36330bin_9  | 4          | 2         | 4         | 2         |

**Table S7.** Presence of MAGs<sub>95%ANI</sub> in seawater, macroalgae and sponge samples. Adapter-trimmed reads from samples collected in August 2016 and February 2017 were mapped (75% minimum alignment and 95% minimum identity) against the de-replicated MAGs<sub>95%ANI</sub> with coverM v0.2.0 (<https://github.com/wwood/CoverM>). Nine sponge MAGs<sub>95%ANI</sub> were present in seawater and macroalgae samples, 14 seawater MAGs<sub>95%ANI</sub> were present in sponge and macroalgae samples and no macroalgae MAGs<sub>95%ANI</sub> were found in seawater and sponge samples.

| Sponge MAGs   | Domain     | Phylum              | Class                 | Order                | Family                | Genus             | seawater samples |        |        |        |        |        | macroalgae samples |        |        |        |        |        |
|---------------|------------|---------------------|-----------------------|----------------------|-----------------------|-------------------|------------------|--------|--------|--------|--------|--------|--------------------|--------|--------|--------|--------|--------|
|               |            |                     |                       |                      |                       |                   | Aug-16           | Aug-16 | Aug-16 | Feb-17 | Feb-17 | Feb-17 | Aug-16             | Aug-16 | Aug-16 | Feb-17 | Feb-17 | Feb-17 |
| CO36386bin_10 | d_Bacteria | p_Planctomycetota   | c_Planctomycetes      | o_Pirellulales       | f_Pirellulaceae       | g_Mariniblastus   | 1                | 1      | 1      | 0      | 0      | 0      | 1                  | 0      | 1      | 0      | 0      | 0      |
| CO36386bin_29 | d_Bacteria | p_Cyanobacteriota   | c_Cyanobacteriia      | o_Synechococcales_A  | f_Cyanobiaceae        | g_Synechococcus_C | 1                | 1      | 1      | 1      | 1      | 1      | 0                  | 0      | 1      | 0      | 0      | 0      |
| CO36386bin_37 | d_Bacteria | p_Cyanobacteriota   | c_Cyanobacteriia      | o_Synechococcales_A  | f_Cyanobiaceae        | g_Synechococcus_C | 1                | 1      | 1      | 0      | 0      | 0      | 0                  | 0      | 0      | 0      | 0      | 0      |
| CO36386bin_8  | d_Bacteria | p_Proteobacteria    | c_Gammaproteobacteria | o_Coxiellales        | f_Coxiellaceae        | g_                | 1                | 1      | 1      | 0      | 0      | 0      | 0                  | 0      | 0      | 0      | 0      | 0      |
| CO36386bin_9  | d_Bacteria | p_Proteobacteria    | c_Alphaproteobacteria | o_bin65              | f_bin65               | g_bin65           | 0                | 0      | 0      | 0      | 0      | 0      | 0                  | 0      | 0      | 0      | 0      | 0      |
| CO36387bin_4  | d_Bacteria | p_Planctomycetota   | c_Planctomycetes      | o_Pirellulales       | f_Pirellulaceae       | g_Rubripirellula  | 1                | 1      | 1      | 1      | 1      | 1      | 1                  | 1      | 1      | 0      | 0      | 0      |
| CO36388bin_9  | d_Bacteria | p_Acidobacteriota   | c_Thermoanaerobaculia | o_                   | f_                    | g_                | 0                | 0      | 0      | 0      | 0      | 0      | 1                  | 0      | 1      | 0      | 0      | 0      |
| CO36405bin_2  | d_Bacteria | p_Planctomycetota   | c_Planctomycetes      | o_Pirellulales       | f_UBA1268             | g_UBA1268         | 1                | 1      | 1      | 1      | 1      | 1      | 0                  | 0      | 1      | 0      | 0      | 0      |
| CO36406bin_26 | d_Bacteria | p_Cyanobacteriota   | c_Cyanobacteriia      | o_Synechococcales_A  | f_Cyanobiaceae        | g_Synechococcus_C | 1                | 1      | 1      | 1      | 1      | 1      | 0                  | 0      | 0      | 0      | 0      | 0      |
|               |            |                     |                       |                      |                       |                   |                  |        |        |        |        |        |                    |        |        |        |        |        |
| Seawater MAGs | Domain     | Phylum              | Class                 | Order                | Family                | Genus             | sponge samples   |        |        |        |        |        | macroalgae samples |        |        |        |        |        |
|               |            |                     |                       |                      |                       |                   | Aug-16           | Aug-16 | Aug-16 | Feb-17 | Feb-17 | Feb-17 | Aug-16             | Aug-16 | Aug-16 | Feb-17 | Feb-17 | Feb-17 |
| PL34863bin_32 | d_Bacteria | p_Verrucomicrobiota | c_Verrucomicrobiae    | o_Verrucomicrobiales | f_DEV007              | g_EC70            | 1                | 1      | 0      | 0      | 0      | 0      | 1                  | 1      | 1      | 0      | 0      | 0      |
| PL34863bin_39 | d_Bacteria | p_Cyanobacteriota   | c_Cyanobacteriia      | o_Synechococcales_A  | f_Cyanobiaceae        | g_Synechococcus_C | 1                | 1      | 1      | 1      | 1      | 1      | 0                  | 0      | 1      | 0      | 0      | 0      |
| PL34863bin_51 | d_Bacteria | p_Proteobacteria    | c_Gammaproteobacteria | o_Pseudomonadales    | f_Haliaceae           | g_Luminiphilus    | 1                | 0      | 0      | 0      | 0      | 0      | 0                  | 0      | 0      | 0      | 0      | 0      |
| PL36312bin_4  | d_Bacteria | p_Bacteroidota      | c_Bacteroidia         | o_Flavobacteriales   | f_Crocinitomiacae     | g_UBA952          | 0                | 0      | 0      | 0      | 0      | 0      | 1                  | 1      | 1      | 0      | 0      | 0      |
| PL36312bin_6  | d_Bacteria | p_Actinobacteriota  | c_Acidimicrobiia      | o_Microtrichales     | f_Illumatobacteraceae | g_esp-actino5     | 1                | 1      | 0      | 0      | 0      | 0      | 0                  | 0      | 0      | 0      | 0      | 0      |
| PL36313bin_11 | d_Bacteria | p_Bacteroidota      | c_Bacteroidia         | o_Flavobacteriales   | f_UA16                | g_UBA8752         | 0                | 0      | 0      | 0      | 0      | 0      | 1                  | 1      | 1      | 0      | 0      | 0      |
| PL36313bin_15 | d_Bacteria | p_Proteobacteria    | c_Gammaproteobacteria | o_Pseudomonadales    | f_Pseudohongiell      | g_UBA9145         | 0                | 0      | 0      | 0      | 0      | 0      | 0                  | 0      | 0      | 0      | 0      | 0      |
| PL36313bin_19 | d_Bacteria | p_SAR324            | c_SAR324              | o_SAR324             | f_NAC60-12            | g_JCVI-SCAAA005   | 1                | 1      | 0      | 0      | 1      | 1      | 0                  | 0      | 0      | 0      | 0      | 0      |
| PL36323bin_13 | d_Bacteria | p_Proteobacteria    | c_Gammaproteobacteria | o_Pseudomonadales    | f_Haliaceae           | g_Luminiphilus    | 0                | 0      | 0      | 0      | 0      | 0      | 1                  | 1      | 1      | 1      | 0      | 0      |
| PL36324bin_7  | d_Bacteria | p_Proteobacteria    | c_Alphaproteobacteria | o_Rhodobacterales    | f_Rhodobacteraceae    | g_HIMB11          | 1                | 0      | 0      | 0      | 0      | 0      | 0                  | 0      | 0      | 0      | 0      | 0      |
| PL36327bin_9  | d_Bacteria | p_Bacteroidota      | c_Bacteroidia         | o_Flavobacteriales   | f_Flavobacteriaceae   | g_UBA3478         | 0                | 0      | 0      | 0      | 0      | 0      | 1                  | 1      | 1      | 1      | 0      | 1      |
| PL36328bin_12 | d_Bacteria | p_Proteobacteria    | c_Gammaproteobacteria | o_Xanthomonadales    | f_                    | g_                | 0                | 0      | 0      | 1      | 1      | 1      | 1                  | 1      | 1      | 1      | 1      | 1      |
| PL36328bin_29 | d_Bacteria | p_Planctomycetota   | c_Planctomycetes      | o_Pirellulales       | f_Pirellulaceae       | g_Rubripirellula  | 1                | 1      | 0      | 1      | 1      | 1      | 0                  | 0      | 1      | 1      | 0      | 0      |
| PL36329bin_53 | d_Bacteria | p_Bacteroidota      | c_Bacteroidia         | o_Flavobacteriales   | f_Flavobacteriaceae   | g_MED-G14         | 0                | 0      | 0      | 0      | 0      | 0      | 1                  | 1      | 1      | 0      | 0      | 0      |
